1 **Herd immunity vs suppressed equilibrium in COVID-19 pandemic: different**  
2 **goals require different models for tracking**

3

4

5 **Authors:**

6 Norden E. Huang<sup>#</sup>, Fangli Qiao<sup>#</sup>, Wang Qian<sup>+</sup> and Ka-Kit Tung<sup>\*</sup>

7

8 **Affiliations:**

9 <sup>#</sup> *Data Analysis Laboratory, FIO, Qingdao 266061, China*

10 <sup>+</sup> *Shanghai Jiao Tong University, Shanghai, 200240, China*

11 <sup>\*</sup> *Department of Applied Mathematics, University of Washington, Seattle, WA 98195*

12 <sup>#</sup> Co-first authors: These authors contribute equally to this work.

13 FQ: [qiaofl@fio.org.cn](mailto:qiaofl@fio.org.cn). NEH: [norden@ncu.edu.tw](mailto:norden@ncu.edu.tw)

14 <sup>\*</sup>Corresponding author: [ktung@uw.edu](mailto:ktung@uw.edu)

15

16 **KEYWORDS**

17 Covid-19; Epidemiology; herd immunity; suppressed equilibrium; Data-driven  
18 approach; prediction of turning point; Active Infected Cases; peak total  
19 hospitalizations; duration of hospital stay; end of epidemic; local-in-time metric.

20

21

22 **ABSTRACT**

23

24 **New COVID-19 epicenters have sprung up in Europe and US as the epidemic in**  
25 **China wanes. Many mechanistic models' past predictions for China were**  
26 **widely off the mark (1, 2), and still vary widely for the new epicenters, due to**  
27 **uncertain disease characteristics. The epidemic ended in Wuhan, and later in**  
28 **South Korea, with less than 1% of their population infected, much less than**  
29 **that required to achieve "herd immunity". Now as most countries pursue the**  
30 **goal of "suppressed equilibrium", the traditional concept of "herd immunity"**  
31 **in epidemiology needs to be re-examined. Traditional model predictions of**  
32 **large potential impacts serve their purpose in prompting policy decisions on**  
33 **contact suppression and lockdown to combat the spread, and are useful for**  
34 **evaluating various scenarios. After imposition of these measures it is**  
35 **important to turn to statistical models that incorporate real-time information**  
36 **that reflects ongoing policy implementation and degrees of compliance to**  
37 **more realistically track and project the epidemic's course. Here we apply such**  
38 **a tool, supported by theory and validated by past data as accurate, to US and**  
39 **Europe. Most countries started with a Reproduction Number of 4 and declined**  
40 **to around 1 at a rate highly dependent on contact-reduction measures.**

41

42

43

44

## 45 **1. Introduction.**

46

47 Almost one hundred years ago, a classic paper published in Proceedings of Royal  
48 Society by Kermack and McKendrick (3), entitled “A contribution of mathematical  
49 theory of epidemic”, started the tradition of mathematical modelling on the spread  
50 of infectious disease among a susceptible population. Current thinking in  
51 epidemiology is still deeply rooted in concepts introduced in that paper, some of  
52 which are still relevant, while others need to be modified. The mechanistic model  
53 they introduced is called the SIR model, for Susceptible-Infected-  
54 Recovered/Removed: A susceptible population is infected by the introduction of a  
55 few infected individuals. The infected population eventually recovered, and in the  
56 process acquiring immunity to the original infectious disease, or dead (removed).  
57 An epidemic ends when susceptibles are exhausted as most of the population is  
58 immunized this way, achieving “herd immunity”. There have been many variants to  
59 this basic model. One common modification is to add an extra population of E for  
60 exposed individuals who are not yet infectious, in the so-called SEIR model. Other---  
61 agent-based---- models take advantage of the modern computing power to further  
62 subdivide the population into many subgroups and even simulate movements of  
63 individuals. But basic concepts are similar to the SIR model. These mechanistic  
64 models are of critical importance before the outbreak starts, for the models could be  
65 used to explore various scenarios for policy decisions on social distancing and  
66 lockdown. Once the outbreak starts, a different kind of models are needed----so far  
67 not well developed----which are capable of using real-time data to provide the  
68 needed parameters for epidemic management, predict various turning points and  
69 peak medical resource needs, and monitor the effect of compliance of the quarantine.  
70 In this paper, we introduce such a statistical model, supported by theory and  
71 validated by observed data.

72

73 There are actually two possible end states of an epidemic: one is through “herd  
74 immunity” mentioned above when we discuss the mechanistic models, and the  
75 other is an unstable state achieved by suppressing contacts among individuals,  
76 called “suppressed equilibrium” here, which is pursued by most countries in this  
77 pandemic, though many policy makers may not be aware of the distinction between  
78 the two. This second state is (parametrically) unstable because if the social  
79 distancing measures are relaxed and the businesses reopened, the disease could  
80 initiate a second wave, as most of the population has not acquired immunity. Even if  
81 the epidemic ends in one country, there could still be subsequent waves of infection  
82 by imports from abroad unless there is strict quarantine of cross-border travelers.  
83 There is also a third route: to suppress just enough so that the maximum cases of  
84 hospitalizations are kept below the maximum capacity of the medical system in each  
85 district, delaying long enough either for the population to eventually achieve herd  
86 immunity or for a vaccine to be developed for the disease. More people would be  
87 infected and more would die in this approach than the suppressed equilibrium, but  
88 less than that in the herd immunity scenario, where the hospitals may become

89 overwhelmed. Which approach to take is the difficult decision confronting policy  
90 makers at the beginning of an epidemic.

91  
92 It was reported (2) that UK first contemplated not suppressing the epidemic  
93 through lockdowns, fearing that doing so would only lead to a larger second  
94 outbreak because most of the population would not have gained immunity. So the  
95 plan was to let the epidemic run its course while protecting the elderly. But when  
96 shown a model prediction (4) that such a “do-nothing scenario” would lead to  
97 500,000 deaths and 81% of the population infected, policy makers changed course  
98 and imposed strict counter measures. This is an important and proper role for a  
99 model, to prompt policy actions to combat the spread of the disease. Once the  
100 outbreak started, the accuracy of the mechanistic model predictions cannot be  
101 verified as the forecast forever changed the course of the epidemic in UK. Health  
102 officials in Sweden didn’t believe in models and decided to pursue “herd immunity”  
103 starting 12 March.

104  
105 The number of people that will have to be infected before achieving herd immunity  
106 depends on how contagious the disease is. The 16 March report of Ferguson et al.(4)  
107 assumed an infection rate, expressed in terms of Basis Reproductive Number  $R_0$  of  
108 2.4. For US it predicted that 81% of the population would have to be infected in this  
109 do-nothing scenario, or about 250 million, resulting in 2.2 million dead. Later  
110 updates in the 30 March report of Flaxman et al. (5) suggested that  $R_0$  should be  
111 above 4 for European countries studied. Estimating this number will be one of the  
112 tasks in the present work so that one can evaluate what it entails for the herd-  
113 immunity approach. We will later show, directly from data, that this estimate of  $R_0$   
114  $\sim 4$  also holds for the US, and in fact approximately so for every country we  
115 examined. So over 90% of the US population would need to be infected before herd  
116 immunity could be achieved. COVID-19 turns out to be much more contagious than  
117 originally thought. See also (6).

118  
119 Since a “suppressed equilibrium” is achieved in a very different manner than that for  
120 the “herd immunity”, our estimate of the end date of the epidemic as a consequence  
121 of contact suppression is not based on the number of susceptibles,  $S$ , approaching a  
122 small critical value (i.e. when most of the population is infected, hence acquiring  
123 immunity), but the daily new cases  $N(t)$  approaching zero and remaining so for two  
124 incubation periods. For prediction purpose, the date when the  $N(t)$  is near zero is  
125 estimated by 3 standard deviations from its peak. These two quantities, the peak  
126 and the standard deviation, can be extracted from the data as the epidemic is  
127 developing. Our estimate of the end of the epidemic is earlier, usually significantly  
128 so, because it does not depend on a high percentage of the population having been  
129 infected to achieve herd immunity.

130  
131 For South Korea, the epidemic in that country ended with just 0.02% of its  
132 population infected. Wuhan, the epidemic ended with less than 0.5% of its  
133 population infected, both less than 1% of that required to achieve herd immunity as  
134 predicted by most mechanistic models. Even if these numbers are multiplied by a

135 factor of 10 (as some in the media suggested that the Wuhan data may be an  
136 underestimate), it is still one order of magnitude less. Furthermore, it is generally  
137 accepted that South Korea's data are good. Indeed, the situation in these countries  
138 represents early examples of the "suppressed equilibrium". Because of its much  
139 lower number of deaths, such an end state is a goal that most countries have  
140 decided to pursue, despite the enormous toll on the economy due to the much  
141 reduced business activity for the two to three months that it would take to achieve it.

142  
143 The above-quoted numbers for Wuhan and South Korea are for the confirmed cases,  
144 and do not include the asymptomatic infected. Recently (in early April) about 3,330  
145 individuals in Santa Clara County in California were tested for antibodies to the  
146 COVID-19 virus in their blood (7). 50 were tested positive (meaning that they were  
147 exposed in the past to the virus), yielding a crude prevalence rate of 1.5%. When  
148 weighed by demographics and extrapolated statistically to the whole county's  
149 population, it was calculated that 2.8% of the population could have been infected,  
150 with a 95% confidence range of 1.3-4.7%. These numbers, less than 5%, are also  
151 much less than what is required to achieve herd immunity, in a county where the  
152 epidemic is waning at the time.

153  
154 In pursuing the "suppressed equilibrium" and monitoring the progress towards it, a  
155 second type of statistical models is required. This type of models should reflect the  
156 contact-reduction measures already in place and the degree of compliance by the  
157 population in each region. Unlike China and South Korea, many European countries  
158 imposed these measures in stages, and so the contact rate among the population  
159 was reduced in a time-dependent way. In US, even before the epidemic is over, some  
160 states are starting to reopen businesses. Only a real-time, data driven model can  
161 reflect these changes. Such a model should be based on sound epidemiological  
162 principles. Prediction based on a purely statistical model without an epidemiological  
163 foundation, even though using real-time and past data, is akin to watching the daily  
164 stock market fluctuations and performing "technical analysis" to ask when the peak  
165 is for an investor to time a sell order. A prediction could be made but the  
166 uncertainty would be so large that it is just likely for the prediction to be right as for  
167 it to be wrong.

168  
169 Each type of models has its strengths and weaknesses. For the mechanistic model,  
170 such as SIR and SEIR or agent-based versions, a key parameter, the infection rate, is  
171 not known for an emerging disease such as SARS-CoV-2, and this has been a source  
172 of difficulty with predictions using such models. For the second type of models,  
173 especially the purely statistical models without epidemiological basis, it is not  
174 known which quantity of the epidemic is predictable. For example, there have been  
175 many empirical models based on the assumption that the progression of daily cases  
176 follow a Gaussian "epidemic curve" in time, starting with the early model of William  
177 Farr in 1840: "Law of Epidemics" in his second annual report to the Registrar  
178 General of England and Wales (8). Lacking the epidemiological mechanism that  
179 Kermack and McKendrick (3) later proposed, the "law" simply reflected Farr's  
180 conviction that the observed deceleration of the rate of increase of infected would

181 not lead to an impending catastrophe but to a crest and then accelerated decline.  
182 The latest is that of the Institute of Health Metrics and Evaluation (IHME)(9). It  
183 turns out that fitting three parameters that define a Gaussian to a short time series  
184 and then using that Gaussian to predict the peaks of the epidemic is an ill-posed  
185 problem(10). The uncertainty for next-day prediction is near 100%, and should  
186 increase further for predictions a few days out (11). In this work we pay special  
187 attention to which epidemiological property is predictable, and we quantify the  
188 uncertainty of our prediction.

189  
190 The search for the correct “geometry of epidemic curves” has a long history in  
191 statistical modelling. Farr’s law is purely descriptive. Farr did not realize that his  
192 epidemic curve is Gaussian but nevertheless his descriptive law of second ratios  
193 could be used for prediction, though not very accurate. For example (see (12)), if  
194  $x_1, x_2, x_3, x_4, x_5, x_6, \dots$  are the successive weekly incidence (i.e. new cases) or mortality,  
195 his law says that the ratio of successive ratios of these numbers is a constant:

196 
$$\frac{x_4/x_3}{x_2/x_1} = \frac{x_5/x_4}{x_3/x_2} = \dots = K,$$

197 which is less than 1. That is, there is a constant deceleration of the rate of growth of  
198 the cases. After measuring this constant from the early weeks’ data, future  
199 incidence values can be predicted. It was John Brownlee in 1907 (13) who realized  
200 that the above formula, when logarithm is taken----turning the ratio of ratios to  
201 difference of differences----is a finite difference form of the second order time-  
202 derivative of  $\log x$  being a negative constant (12):

203 
$$\frac{d^2}{dt^2} \log x = \log K < 0.$$

204 Integrating twice and then taking exponentiation lead to  $x(t)$  being a Gaussian form.  
205 Brownlee thought this normal form for the epidemic curve is a fundamental law in  
206 epidemiology, but his proposed explanation for the declining growth of the  
207 incidence of an epidemic as due to decreasing “infectivity” was not well-received by  
208 epidemiologists at the time.

209  
210 Brownlee (13) provided examples of several epidemics showing that there was fore-  
211 aft symmetry in their epidemic curves. For COVID-19, we find that the epidemic  
212 curve for Wuhan, China follows a Gaussian, with near fore-aft symmetry, but that for  
213 US has a rapid rise but slow decline, definitely not Gaussian. While it may be  
214 possible that without human intervention, a solitary outbreak may follow a  
215 Gaussian curve, in the modern era of contact suppression, the epidemic curve is  
216 shaped by such interventions. We shall explain Wuhan’s shape as due to the fact  
217 that the contact suppression measures were consistently imposed throughout the  
218 course of the outbreak, while in the case of US, its states and the populace, were  
219 relaxing earlier measures on the aft side of the curve, when the new cases declined,  
220 creating a fore-aft asymmetry. Therefore, one should take into account that in the  
221 modern era, as countries pursue a “suppressed equilibrium” at great economic cost,  
222 there is a tendency in countries with decentralized state governments to relax the

223 countermeasures to various degrees once the disease crested, giving rise to  
224 subsequent waves of infection. [A second reason is that the US data is an aggregate  
225 of data for different epicenters, with staggered recovery. A third reason for the  
226 asymmetry may be artificial: In many countries there is usually an increase in the  
227 testing of the population as the production of the test kits and facilities to process  
228 them ramp up after the initial shortage. Therefore it is to be expected that there  
229 would be more cases found later in the course of the epidemic than in the beginning.]

230  
231 Brownlee rejected the idea of herd immunity, that the epidemic's decline was due to  
232 "an exhaustion of susceptibles, enshrined 20 years later in the SIR model of  
233 Kermack and McKendrick (3). His alternative, "infectivity" idea was based on the  
234 thinking that the decline was due to "the loss of infecting power on the part of the  
235 organism"(13), and that this biological property of the pathogen ("organism")  
236 should follow some fundamental law. This biological property of the virus has not  
237 been observed in the current COVID-19 pandemic, and does not appear to be a  
238 factor. However, Brownlee's idea can be resurrected by modifying the definition of  
239 "infectivity" to include social factors, since how many people one infected individual  
240 can infect, as measured by the Effective Reproduction Number,  $R_t$ , depends on the  
241 product of the number of persons contacted during the infectious period and the  
242 probability of the contacted person contracting the disease. After implementation of  
243 contact-reduction measures, we can actually see from the data (in section 2) the  
244 decline of this measure of "infectivity". Furthermore the decline is steeper in  
245 countries that have the more stringent contact-reduction policies and  
246 implementation. Although both the mechanisms of loss of susceptibles and  
247 decrease in "infectivity" are likely at play, with the extremely small percentage of  
248 the population infected in the current pandemic, the second mechanism appears to  
249 be the dominant one as countries strive to achieve the "suppressed equilibrium".  
250 Given this situation, model predictions of the decline of the epidemic based the  
251 number of susceptibles decreasing, as in SIR and SEIR models, may be missing the  
252 main cause for the observed progression of the disease in the current pandemic.

253  
254 Brownlee's idea, with modification expressed above, can be cast in a mathematical  
255 form as:

$$256 \quad x_{t+1} = R_t x_t,$$

257 where  $x_t$  is the incidence (new cases) at time  $t$ , and  $x_{t+1}$  is the incidence one  
258 infectious period later. An infection period is the duration an infected person  
259 remains infectious.  $R_t$  is defined earlier as the number of people one infected  
260 individual would infect during the period when he is infectious. If  $R_t$  is a constant,  
261  $R_t = R_0$ , the solution to the above finite difference equation is:

$$262 \quad x_t = x_0 (R_0)^t ;$$

263 the solution is an unimpeded exponential growth (since  $(R_0)^t = \exp\{t \log R_0\}$ ) for the  
264 relevant case of  $R_0 > 1$ . Brownlee(14) commented that such an epidemic form is  
265 contrary to the facts: "The assumption that the infectivity of an organism is constant,

266 leads to epidemic forms which have no accordance with the actual facts.” With  $R_t$  as  
267 a decreasing function of time, which we find is actually the case in section 2, the  
268 above solution becomes Gaussian-like. Specifically, if  $R_t$  decreases by a factor  $q < 1$   
269 after each period (12, 14), due to a “loss of infecting power”, i.e.  $R_t = R_0 q^{(t-1)}$ , then the  
270 solution is Gaussian:

$$271 \quad x_t = x_0 (R_0)^t q^{t(t-1)/2},$$

272 (since  $x_t = x_0 \exp\{t \log R_0 + \frac{1}{2}t(t-1)\log q\}$ , noting  $\log q < 0$ ).

273 The exponential growth from  $(R_0)^t$  is eventually overtaken by the more rapid  
274 decrease of  $q^{t^2}$ . Note that in this argument, no mention is made of the decrease of  
275 the number of susceptibles; this is not needed when the decrease is so small  
276 compared to the population as a whole.

277  
278 This paper is organized as follows: We first introduce the relationship between the  
279 net infection rate and the Reproduction Numbers. The epidemiological basis for our  
280 model is discussed. Then, we will present a suite of prediction tools for epidemic  
281 management. We will also provide a summary of the COVID-19 inferred  
282 epidemiological characteristics for various countries in Asia, Europe and US. Finally,  
283 a discussion and conclusion will be given. The theoretical support is given in the  
284 appendix.

285

## 286 **2. The net infection rate and the Reproduction Numbers**

287 Before we discuss our prediction model, we first discuss diagnosing a key parameter  
288 used as input in most mechanistic epidemiological models, the infection rate, or  
289 equivalently expressed as the *Basic Reproduction Number* or the time-dependent  
290 *Effective Reproduction Number*. Using real-time data, we diagnose it for different  
291 countries in the world, which actually reflects the underlying influence factors.

292

293 We define in general the *net infection rate*  $\alpha(t)$  as the time-varying exponential  
294 growth rate of the active infected cases (15):

$$295 \quad \alpha(t) = \frac{d}{dt} \log I(t) = \frac{\frac{d}{dt} I(t)}{I(t)}.$$

296 The active infected number,  $I(t)$  is given by the equation that describes its rate of  
297 increase as the daily new infected cases  $N(t)$  minus the daily recovered/removed  
298 case,  $R(t)$ :

$$299 \quad \frac{d}{dt} I = N(t) - R(t).$$

300 The dead (“removed”) is included in  $R(t)$  in our calculations. The peak number of  
301 active infected cases is a key parameter in the planning for hospital resources. This  
302 turning point, denoted by  $t_p$ , can be located in a local-in-time manner by when  $R$   
303 starting to exceed  $N$ , without first accumulate the data in time to find  $I(t)$ . Maximum



304 demand for hospital resources occurs at its peak, and not at the peak of  $N(t)$ ,  
305 although the latter is a more commonly reported quantity.  $R(t)$  is not a factor in the  
306 initial rise of the outbreak, nor is it needed to explain why the rise slows and  
307 eventually crests. However in the waning phase, when the new cases are smaller,  
308 the rising recovered cases need to be taken into account to determine  $t_p$ .

309  
310 In traditional mechanistic models, such as the SIR model(3), there is also a time-  
311 dependent net infection rate, which at  $t=0$ , when the population is completely  
312 susceptible, is related to the *Basic Reproduction Number*  $R_0$ . See ref (16) for a  
313 discussion of the complexities associated with this key parameter. We will not be  
314 using the SIR model but it is useful to relate our general definition to what is  
315 traditionally used. The equation for  $I$  in the SIR model is:

316  
317 
$$dI/dt = aSI - bI = bI(aS/b - 1),$$

318 where  $aS(t)$  is the infection rate and  $b$  is the recovery/removal rate.

319 Therefore 
$$\alpha(t) = \frac{dI/dt}{I} = b\left(\frac{aS(t)}{b} - 1\right) = b(R_t - 1).$$

320 So for the SIR model  $R_t = \frac{aS(t)}{b}$ . So as the population of the susceptible  $S(t)$

321 decreases---“exhaustion of the susceptibles” as hosts for the disease----the Effective  
322 Reproduction Number decreases. More relevant for our discussion is the possibility  
323 that the infection rate  $a$  could change as a result of contact reduction measures in  
324 place.

325  
326 Initially when the whole population is not yet infected, the Basic Reproduction

327 Number is 
$$R_0 = \frac{aS(0)}{b} = R_t(0) = \alpha(0)b + 1.$$

328  
329 The above-defined time-dependent net infection rate generalizes this concept to be  
330 independent of the SIR or other models: If in the course of an epidemic,  $\alpha(t)$  is  
331 positive, the number of infectives will grow exponentially, reaching a peak number  
332 of infectives when  $\alpha(t)=0$  at  $t=t_p$ , which is a critical turning point mentioned  
333 above. Then the total number of active infectives will decrease exponentially. In  
334 terms of  $R_t = \alpha(t)/b + 1$ , if this number is greater (less) than 1 the total number of  
335 active infectives will grow (decrease) at time  $t$ . We will here use  $\alpha(t)$  directly.  $R_t$   
336 however is the more watched quantity by the mainstream modelers (16). It can be  
337 calculated from the net infection rate, but will require a parameter  $b$ , the recovery  
338 rate, which may be different for different regions. Furthermore, many countries do  
339 not keep adequate records on those who recovered, and so there is an uncertainty in  
340 estimating  $b$ . In Figure 2,  $R_t$  is obtained by estimating this parameter as

341  $b \approx 1/\sigma_R \approx 1/\sigma_N$ , where  $\sigma_R$  is the standard deviation for the distribution of the  
342 daily recovered and  $\sigma_N$  is that for the daily newly infected numbers. These

343 parameters are calculated for each country (see Table 1).  $R_0$  is obtained from  $R_t$  in  
344 the initial period, before there is significant recovered population.

345  
346 For an emerging disease such as SARS-CoV-2, there is not enough statistics for  
347 estimating the true infection rate (e.g. the parameter  $a$  in the SIR model). Models  
348 usually assume a value of  $R_0$  or perform scenario calculations for a range of values of  
349  $R_0$ .

350  
351 Figure 1 shows the net infection rate for several countries. Since the official data  
352 that we use include only the confirmed cases (“cases” for short), and these tend to  
353 have more serious symptoms that require hospitalization, the reported  $I$  cases are  
354 commonly referred to as *total hospitalizations*. The peak of total hospitalizations is  
355 closely watched by hospital administrators and policy makers.  $\alpha(t)$  is commonly  
356 referred to as *rate of hospitalization*. Its inverse gives the e-folding time in days for  
357 the cases in an outbreak. A value, of say  $\alpha$  between 0.3 and 0.4, where most  
358 countries cluster in the initial period, implies an e-folding time of about 3 days  
359 (doubling time of 2 days). The much higher values  $\alpha$  for many regions in the  
360 beginning of our data record may not be due to indigenous disease infection. See  
361 later discussion.

362  
363

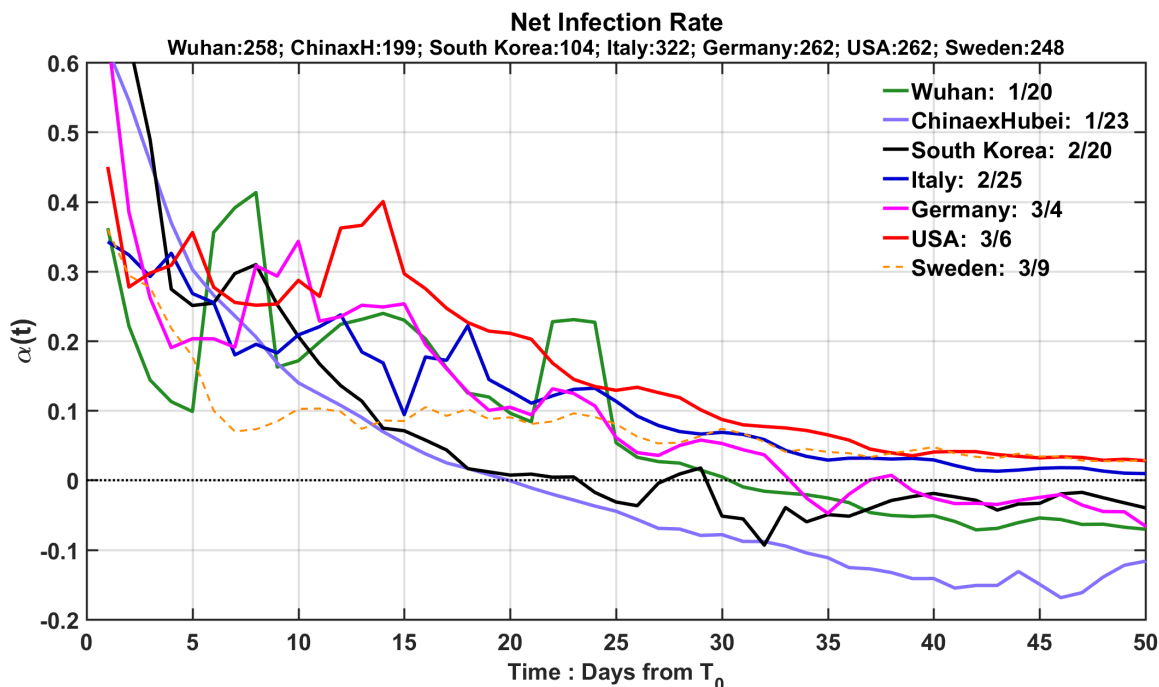

364  
365 **Figure 1.** The time-dependent net infection rate (in units of 1/day) as a function of  
366 time starting on the date (listed in the inset) when the newly confirmed case  
367 number first exceeds 100 for each region. To obtain the actual calendar date, add  
368 the dates on the horizontal axis to the starting date indicated in the inserted legend.  
369 The number of confirmed cases on the starting date is listed at the top. Three day  
370 averaging on the raw data has been used.

371

372 The time for different countries is aligned in Figure 1 to begin the time series when  
373 each region reached 100 new cases. This way, the progression of the epidemic in  
374 each country can be compared. Figure 1 reveals the effects of different policy  
375 measures each country adopted. First, South Korea and China exHubei have similar  
376 net infection rates (until past their respective turning point); both are much lower  
377 than other countries. In the case of South Korea, the government identified early  
378 that its epicenter of the epidemic was at church gatherings in the city of Daegu and  
379 North Gyeongsang province, where 90% of the initial cases were found. Specifically,  
380 a confirmed COVID-19 patient was reported to have attended the Shincheonji  
381 Church of Jesus services twice on February 9th and 16th. Then aggressive contact  
382 tracing was pursued. After the turning point, South Korea soon experienced some  
383 second wave episodes, which were successfully contained. These two regions'  
384 rigorously implemented contact reduction and aggressive pursuit of 'test-trace-treat'  
385 measures led to them being the extreme examples of the "suppressed equilibrium".

386

387 Germany and Italy have similar exponential growth rates of the net infected case  
388 numbers, both slightly higher than Wuhan. More surprisingly, US has the highest  
389 exponential net infection rate, 1.5 times that of Germany and Italy and twice that of  
390 Wuhan. This can be attributed to the fact that US so far does not have a nation-wide  
391 lockdown, and Europe has had partial lockdowns in phases. Germany took a week  
392 longer than Wuhan to reach its turning point, while US will take weeks longer than  
393 Germany. China outside Hubei reached its turning point early, in fact 9 days earlier  
394 than the epicenter, Wuhan. This fact is significant, for it is qualitatively different  
395 than many mechanistic model predictions, which had the epicenter achieving its  
396 turning point 1-2 weeks earlier than China outside Hubei (17), probably based on  
397 the herd immunity concept.

398

399 The net infection rates for China outside Hubei and South Korea are more  
400 monotonic than other regions shown. This is due to the fact that there was not a  
401 piece-meal imposition of social-distancing measures, unlike other western countries.  
402 The strict measures were imposed and enforced throughout the course. [For  
403 Wuhan, the large spike on day 23(12 February) was due to a change in the  
404 diagnostic criteria from a positive nucleic acid test to chest scans, booking in one  
405 day more than 13,000 cases.]

406

407 The case of Sweden needs a special explanation. The epidemic in Sweden initially  
408 grows with an e-folding time of around 3 days, in line with other countries. Then on  
409 12 March the government announced that because of limited resources, it no longer  
410 would test for the COVID-19 infection, except for those with serious symptoms  
411 already in the hospitals who furthermore are also in the high-risk group. As a result  
412 the new cases took a nose-dive on that day, leading to an artificially low net  
413 infection rate of 0.1, implying a 10 day e-folding time. The denominator in the  
414 calculation for  $\alpha(t)$  is  $I(t)$ , which is an accumulated quantity, and includes those  
415 who tested positive prior to 12 March under more liberal criteria, and so this

416 situation leads to a flat, low level of  $\alpha(t)$  just above 0. It would eventually cross 0  
 417 with a large enough death numbers. Sweden’s policy decision to pursue “herd  
 418 immunity” (while protecting the elderly) has been touted as a viable and perhaps  
 419 preferable approach to those of other countries in their pursuit of “suppressed  
 420 equilibrium”. It only encouraged those over 70 to stay home and banned visits to the  
 421 nursing home and gatherings with over 50 people, while business, stores,  
 422 restaurants and kindergarten through grade nine are open. The success or failure of  
 423 this approach cannot be evaluated by the incomplete data. Intriguingly, based on  
 424 the recorded death number, it shows that Sweden’s toll is 5 and 11 times that of its  
 425 neighbors Denmark and Norway, respectively. The population in each of these  
 426 neighbors is half that of Sweden.  
 427

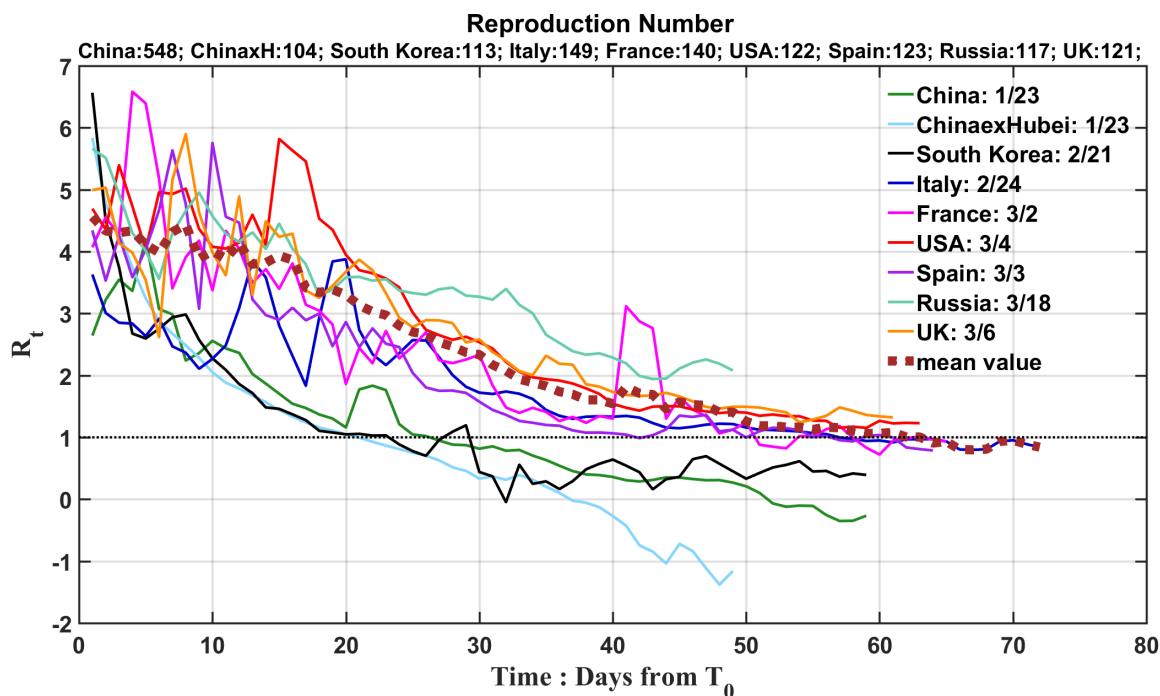

428  
 429  
 430

431 **Figure 2.** Effective Reproduction Number for each country or region. The horizontal  
 432 axis denotes days since day 0 (the corresponding calendar date is given in the inset),  
 433 which is the starting date for our calculation. This date is determined by the  
 434 threshold that the accumulated number of infectives first exceeds 100. The actual  
 435 number for each region on that day is listed at the top. The thick dashed curve is  
 436 the average of the curves for USA and European countries, including Russia.  
 437

438 Figure 2 converts Figure 1 to show  $R_t$  for each country. It shows that  $R_t$  clusters  
 439 around 4 for all countries in the initial period. Because of the problems for the data  
 440 in the initial period, the curves cannot be extended back in time to deduce  $R_0$ . But  
 441 based on  $R_t$  a few days later,  $R_0$  for COVID-19 should be around 4, similar to that for  
 442 SARS. It was originally thought that COVID-19’s  $R_0$  was between 2.0 to 2.5 (18),  
 443 seemingly much less contagious than SARS at 4 (19). It is also much more

444 contagious than the 2009 swine flu pandemic, caused by the H1N1 virus, whose  $R_0$   
445 was estimated(20) to be 1.4 to 1.6.

446

447 In deducing the Reproduction Numbers we should not count the large spike for  
448 China outside Hubei on day 4. That increase was not due to indigenous  
449 transmission, for most of the initial cases were imported from Hubei. This should  
450 not be used to infer the Reproduction Number. Similarly for South Korea in the first  
451 few days shown.

452

453 As is in Figure 1, the decrease of  $R_t$  from 4 to 1 for different countries reflects  
454 different level of contact-reduction measures adopted and enforced. With China  
455 outside Hubei and South Korea sloping more steeply than Europe than US. The  
456 behavior of these numbers for the European countries are rather similar to the  
457 model results of Flaxman et al.(5) of Imperial College (their Figure 2), who imposed  
458 these measures in their model on the dates they were actually imposed. With their  
459 emphasis on more accurately predicting the mortality, when  $R_0 \sim 4$  is used in their  
460 SEIR model the modeled death numbers are close to the reported deaths, but the  
461 number of infected in the model is an order of magnitude higher (Figure 2 in (5)).  
462 This is reasonable and consistent with our earlier statement that the data of infected  
463 cases do not include the asymptomatics or those with mild symptoms who were not  
464 tested, but reflect those with more serious symptoms that required hospitalization,  
465 and therefore more prone to die.

466

467 UK's record for the recovered is almost nonexistent, and what is available shows  
468 that the recovered number is only a few percent of the deaths, which does not  
469 appear to be reasonable. Without the recovered in the data, UK's  $R_t$  hovers above 1.  
470 There appears to be a similar situation in some other countries, such as Italy.  
471 Therefore, the behavior of  $R_t$  in the later stages of the epidemic (in the  
472 neighborhood of the turning point) is probably not correctly depicted by the data  
473 shown for these countries. Nevertheless, in the initial period, when the number of  
474 recovered is small, the data shown can be used to estimate  $R_t$  and  $R_0$ .

475

476 SEIR model was also used to deduce the Reproduction Number by Institute of  
477 Disease Modeling (21) in an effort to monitor the effect of social distancing  
478 measures adopted near Seattle (King County, Washington). They found that  $R_t$  was  
479 reduced from 2.7 to 1.4. Since it was not below 1, the Institute's report advised  
480 continuing the measures in place. Since the report rate  $p$ , that is, the ratio of the  
481 number of reported cases vs. the true infected number, was unknown, the authors  
482 assumed a range of values and obtained,  $R_0 \sim 2.7 \pm 0.9$ . One can see from this  
483 application of the Reproduction Numbers how important it is to monitor in real-  
484 time the progress of policy measures to determine whether it is time to relax the  
485 measures in place. And also how difficult it is to infer these numbers.

486

487 The report rate  $p$  is the ratio of the confirmed cases to the true infected numbers. If  
488 it were known, the case numbers can be divided by  $p$  to yield the true infected

489 numbers. Because it is largely unknown at the present time, it creates the  
490 aforementioned uncertainty in estimating Reproduction Numbers using models.  
491 However, since our net infection rate  $\alpha(t)$  is a ratio of the derivative of  $I$  and  $I$ ,  
492 dividing each by  $p$  does not change the ratio. We therefore recommend using the  
493 net infection rate for real-time monitoring instead of the Reproduction Number.  
494 The assumption is that the report rate has not changed in time, at least not during  
495 the two-week period prior to  $t$  that the accumulation takes place for the  
496 denominator (see Appendix). This same consideration is also partly behind our later  
497 using the ratio of new cases to recovered cases for prediction.

498  
499 The problem with the data for Sweden is that in addition to the change in the report  
500 rate, the record for the recovered is not available.

501  
502 This discussion also highlights the difficulty of using mechanistic models for real-  
503 time monitoring. In addition to not knowing the report rate  $p$  to compare model  
504 output with the reported case numbers, a key parameter needed in the mechanistic  
505 models, the infection rate  $a$ , is largely unknown for the emerging disease. There is a  
506 large population of asymptomatic, untested and unreported infectives. This infected  
507 population is nevertheless infectious and produces some of the infected cases  
508 reported. It would usually lead to an overestimate of the infection rate  $a$  when only  
509 the reported cases are used in the estimation. Our tools do not need to use an  
510 infection rate for prediction.

### 511 512 **3. Epidemiological basis**

513 After establishing the relationship between the net infection rate and the  
514 Reproduction Numbers, we briefly summarize the main ingredients to establish the  
515 epidemiological basis of our model. Details of our model are given in the Appendix.  
516 The model is used here only to infer general properties of an outbreak, and to  
517 discover which properties can be predicted.

518  
519 Based on epidemiological theory, the infected population is governed by the Von  
520 Foerster equation in an age-structure population model (see (22)), where “age”,  $s$ , is  
521 days since first infected. The infection at age 0 is governed by the “birth” dynamics,  
522 the infection dynamics, and death due to natural causes is ignored. An infected  
523 individual is assumed to be infectious in an age-dependent way until  $T$ , when the  
524 individual is either cured or dead, in either case no longer belonging to the  
525 population of the infectives, where  $T$  is the mean recovery/removal period. The  
526 solution to this partial equation (via the method of characteristics) yields certain  
527 rather general results.

528  
529 **Conservation Law.** For  $t > T$

530  
531 
$$R(t) = N(t - T).$$

532 The distribution of the newly recovery/removal follows that of the newly infected  
533 with a time delay of  $T$ . When applied to hospitalizations, it says that those who are

534 admitted to the hospital either recover after a mean hospital stay of  $T$  days, or dead  
535 after a similar number of days. A more complicated relationship holds for  $t < T$ .

536

537 Since hospital stay acts like a filter for  $R(t)$ , the profile for  $R$  is slightly wider than  
538 that for  $N$ . Appendix takes this into account.

539

540  $R(t)$  here actually consists of two parts: the recovered individuals  $R_c(t)$  and the  
541 removed (dead) individuals,  $D(t)$ :  $R(t) = R_c(t) + D(t)$ .

542

543 **Validation after the fact:** This fundamental relationship can be validated  
544 statistically with data, provided the data is long enough. This is one of the ways the  
545 mean recovery period  $T$  is determined statistically from data, but it is not practical  
546 in the early phase of the epidemic.

547

548 Since  $R_c(t)$  and  $D(t)$  are a subset of  $R(t)$ , the time lag relationship should also hold.  
549 Additional insight can be gained by looking at them separately. Figures 3, obtained  
550 using the longest data from China, South Korea and Italy during the COVID-19  
551 pandemic, shows that  $N(t)$  and  $R(t)$  are highly correlated: with correlation  
552 coefficients all over 0.9 when both distributions are smoothed with 3-point boxcar.  
553 The mean time delay of the correlation is denoted by  $\mu$ , which can be interpreted as  
554 a statistical mean of  $T$ . The spread of the cross-correlation is measured by its  
555 standard deviation,  $\sigma_c$ ; its value is also given in the figure. The lag time (and  
556 standard deviation) of  $R(t)$  for China is 19 days ( $\sigma_c=17.7$  days) for South Korea is 23  
557 days ( $\sigma_c=19.8$  days) and for Italy is only 10 days ( $\sigma_c=21.2$  days). Due to their low Case  
558 Fatality Rate (CFR), there is practically no difference between  $R(t)$  and  $R_c(t)$  for  
559 China and Korea. But for Italy, which has a high CFR, there are differences among  
560 the constituting parts. Why Italy's lag time between  $R(t)$  and  $N(t)$  is shorter than  
561 China and South Korea needs a deeper examination, and it does not necessarily  
562 mean the shorter the better. The lag time of  $D(t)$  for China is 7 days, for Korea is 17  
563 and for Italy is only 3 days. The short survival time for patients in the hospital is an  
564 indication that the Italian hospitals were overwhelmed and allocation of ventilators  
565 was selective to those more likely to survive. This mortality component reduces the  
566 overall time for recovery/removal for Italy to 10 days.

567

568

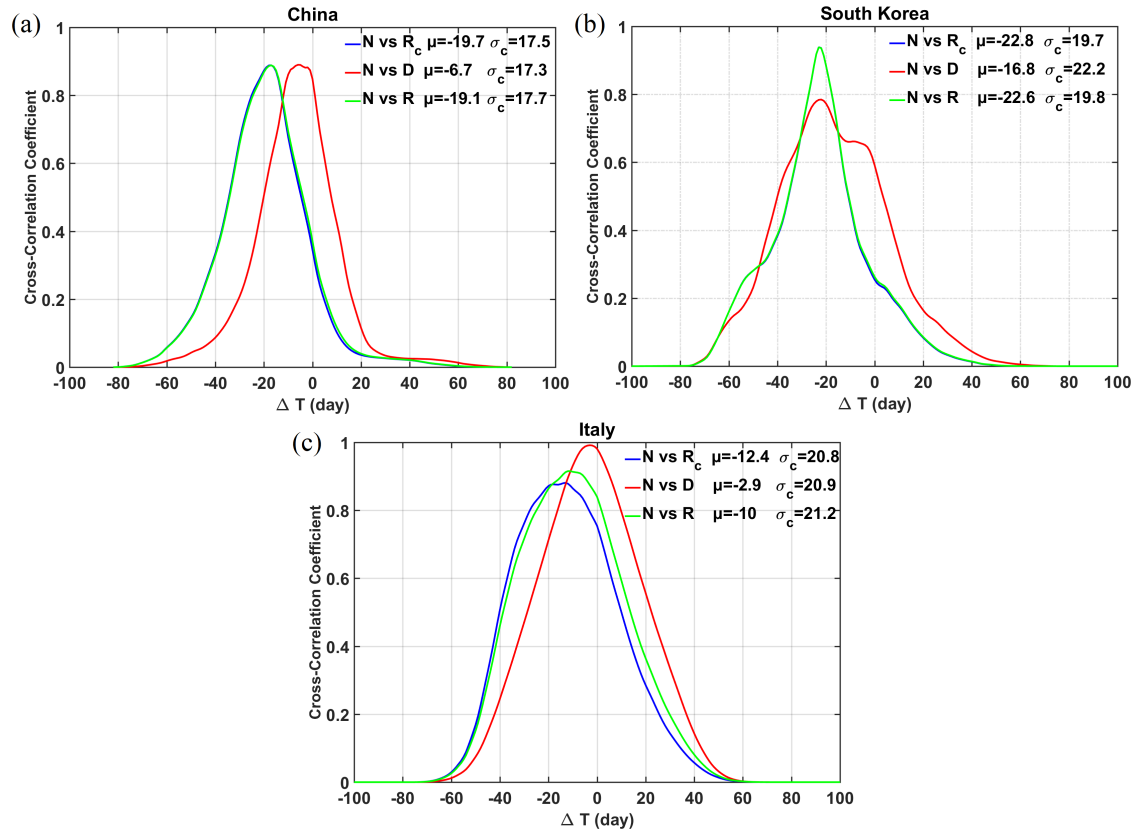

569  
570

571 **Figure 3.** Lagged cross-correlation of  $R_c(t)$ ,  $D(t)$  and  $R(t)$  with  $N(t)$  for China, South  
572 Korea and Italy. Collectively or individually, the conservation law and time lag  
573 relationship are validated. The separated  $R_c(t)$  and  $D(t)$  reveal the stress the  
574 regional hospitals had experienced.

575

### 576 Epidemic curve.

577 Furthermore, the solution to the model equations (in Appendix) shows that the  
578 time-dependent profile of  $N(t)$ , sometimes referred to as “the epidemic curve”, is  
579 determined by the “age” distribution, and the method of characteristics in the  
580 solution converts that “age” distribution into a time profile. The details of the “age”  
581 distribution depend on the “birth” process and on how long it has been since the  
582 outbreak first begins. We assume that we do not mix data from different epicenters  
583 (the homogeneity assumption). Focusing on a single outbreak, which starts at  $t=0$ ,  
584 we examine the “age” distribution at a time  $t_B$  much longer than the initial  
585 incubation period. Then we assume there exists a full spectrum of age with  $s$   
586 between 0 and  $T$  in a Gaussian-like form. To the right of the peak in the “age”  
587 distribution, it is easy to understand that those who are “older” should be less in  
588 number because they were infected during an earlier stage of the epidemic. As the  
589 epidemic grows exponentially, there are more and more “younger” infectives. To the  
590 left of the peak in “age” distribution many infectives are at various stages of  
591 incubation. Those who are newly infected may be much large in number, but since  
592 they have not yet developed symptoms, they are less likely to be tested, hospitalized,



593 and contribute to the “case” record. For Covid-19, the peak infectiousness occurs in  
594 a period just before and after the onset of symptoms, around 5-6 days since first  
595 infected(23). The above discussion gives an epidemiological justification for a  
596 Gaussian-like distribution of the “age” distribution of the “new cases”, more  
597 appropriately called “new hospitalization per day”. It is consistent with the  
598 argument given in the Introduction in favor of a Gaussian-like epidemiological curve.  
599 It should be pointed out that historically, for obvious reasons, asymptomatics were  
600 also not included in the “incidence”, or “mortality”, which were used by Farr to  
601 obtain his law of second ratios or by Brownlee to obtain his normal curves.

602  
603 With the possible exception of South Korea, in most countries there could be  
604 multiple seeding of the outbreak occurring at slightly different times. These  
605 staggered series of outbreaks merge in a continuum in the data for that country,  
606 leading to a standard deviation in the new cases that is wider than that from the  
607 “age” distribution. This is a complication we need to take into account.

608  
609 Also, in many countries, pressure mounts for policy makers to relax the contact-  
610 reduction measures when case counts pass the peak and are declining. In some  
611 countries where the restrictions are gradually lifted, we should expect a long tail in  
612 the epidemic profile, which is therefore not symmetric with respect to the peak.  
613 This external influence to the original expected progression of the course should be  
614 monitored and adjustment to predictions made in real time. As will be discussed in  
615 subsequent sections, our model has the ability to adapt to these changes in its role  
616 as a monitoring tool. Nevertheless, we find, after the fact, that predictions for the  
617 various turning points are still accurate even without taking into account the  
618 changes. It turns out that, consistent with the above discussion, the relaxation of  
619 contact-reduction measures, which lengthens the standard deviation of the new  
620 cases, is only significant in the later stages of the course, and can be ignored before  
621 the peak, but the prediction on the evolution after the peaks on quantities such as  
622 the end of the epidemic and the total number of infected is likely not accurate unless  
623 the changes are taken into account. (This has not been done in Table 1.)

#### 624 625 **4. A suite of tools for tracking the epidemic.**

626 Based on theoretical considerations, we developed a suite of tools for monitoring  
627 the evolution of the epidemic. They can be used to predict the timing of several  
628 turning points and the number of infectives associated with each. These include  $t_N$ ,  
629 the peak of the daily new cases;  $t_R$ , the peak of daily recovered/removed cases, and  
630  $t_p$ , the turning point where the active infected cases (AIC), or total hospitalizations,  
631 is a maximum. This is the point of maximum strain on the hospital resources. It  
632 needs to be closely monitored to keep the AIC below the hospital capacity. We also  
633 estimate the date when the epidemic ends and the country can be reopened,  $t_c$ .

634  
635 A more accurate and robust prediction tool is based on the ratio of  $N(t)$  and  $R(t)$ ,  
636 designated as the  $NR$  ratio. This ratio also alleviates to some extent the problem

637 related to the data of reported cases being a fraction  $p$  of the true numbers, as  $p$   
638 cancels out in the ratio. Unfortunately, some countries, such as UK and Sweden, do  
639 not keep adequate record of  $R(t)$ , and many country do not keep a rigorous standard,  
640 which could be detect by the low case recovery rate, indicating the violation, or  
641 leakage, of the conservation law. For these countries a less accurate method, in the  
642 sense of having larger error bars, can still be used when only information on  $N(t)$  is  
643 available. These are described below. We have used the data from countries that  
644 have the longest records for COVID-19 to verify properties of these methods.

645

#### 646 **4.1 Log of NR ratio:**

647

648 We define the  $NR$  ratio as

649

$$NR(t)=N(t)/R(t).$$

650

At  $t_p$ ,  $NR=1$ .

651

652 We show in Figure 4, using the data of the epidemic for COVID-19 for the longest  
653 records available in some countries, that the logarithm of  $NR(t)$  lies on a straight line,  
654 with small scatter, passing through the turning point  $t_p$ . And data for various stages  
655 of the epidemic, from the initial exponential growth stage, to near the peak of  $AIC$ ,  
656 and then past the peak, all lie on the same straight line. The intercept with  $\log NR=0$   
657 yields the turning point. This line, obtained by linear-least-square fit, is little  
658 affected by the rather large artificial spike in the data on 12 February for China,  
659 because of its short duration and the logarithmic value. That reporting problem is  
660 necessarily of short duration because, on the date of definition change, previous  
661 week's cases of infectives according to the new criteria were reported in one day.  
662 After that, the book is cleared, and  $N(t)$  returned to its normal range.

663

664

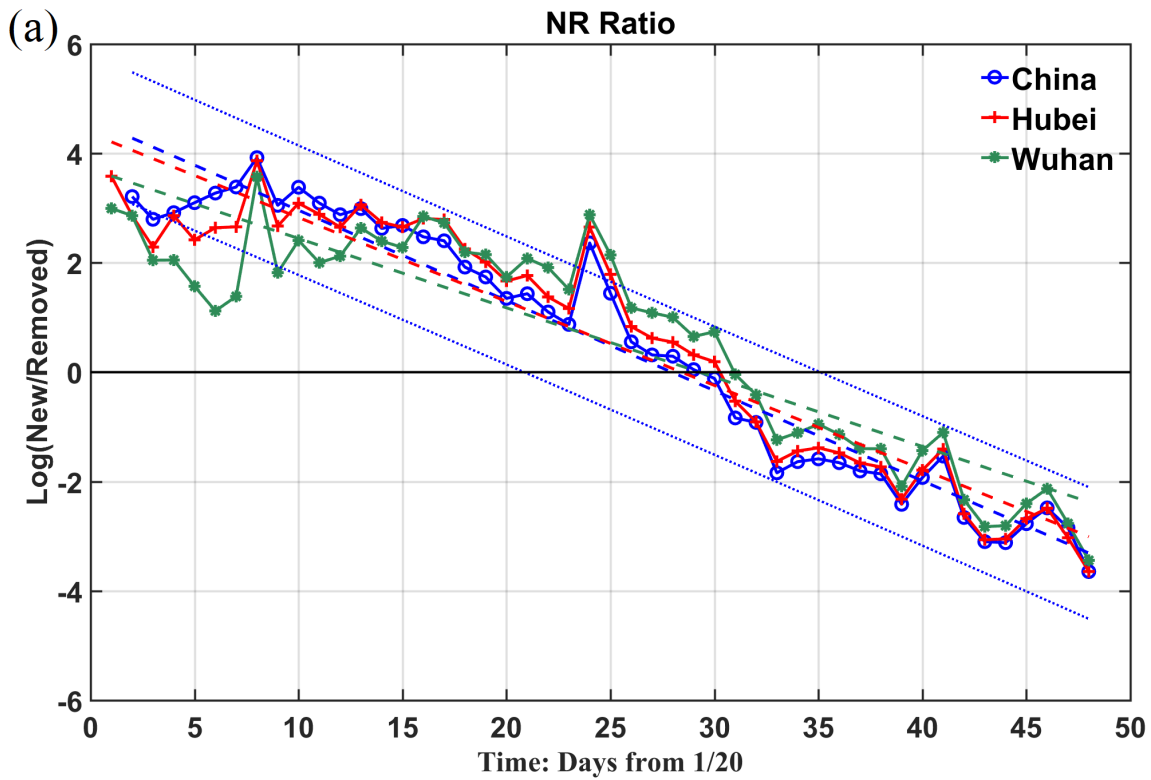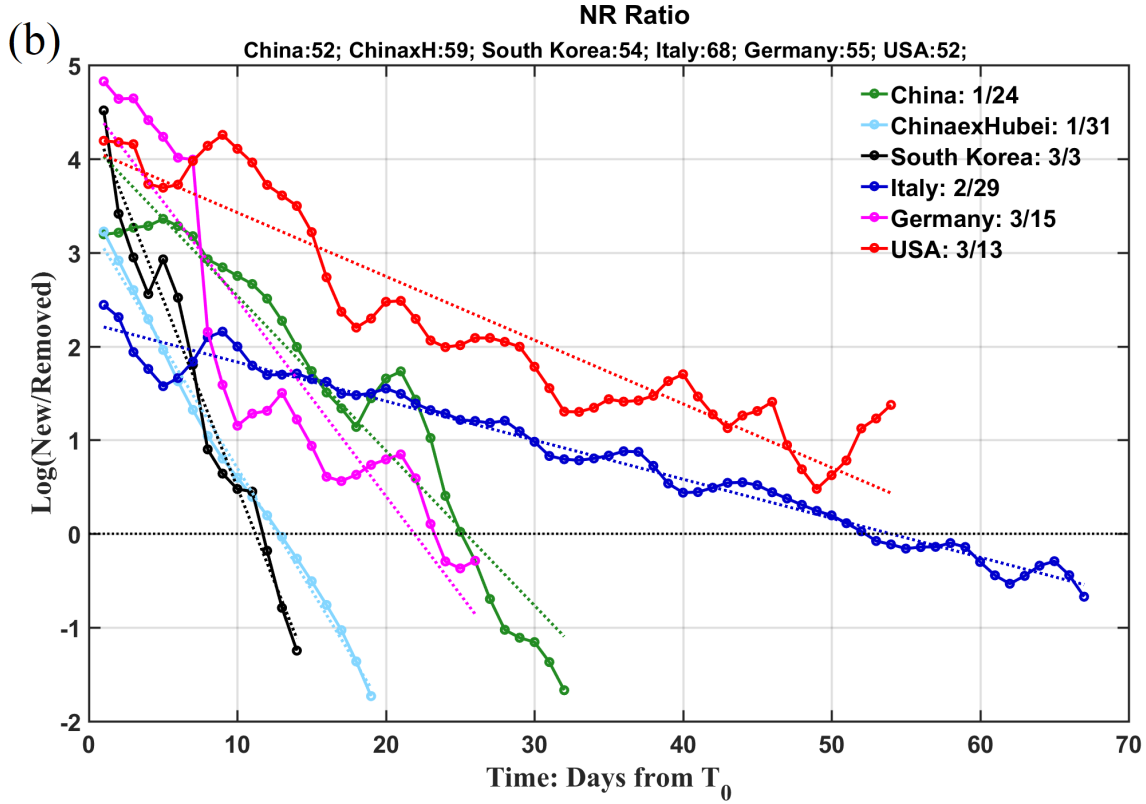

665  
666

667 **Figure 4.** Natural Logarithm of the ratio of daily newly infected to newly  
668 recovered/removed. They lie on straight lines with some small scatter. The straight  
669 line obtained by linear-least squares fit is in dotted line with the same color for each  
670 country. (a) For China, the slopes of the lines are almost the same but with different  
671 intercept; the trend lines cross zero (the black solid line) at different time for  
672 different regions indicating different peaking time for *AIC*. The epicenter Wuhan  
673 (green) has latest turning point than its province Hubei (pink), which has a later  
674 turning point than China as a whole (cyan). As a measure of confidence of the linear-  
675 least square fit, the 95% confidence limit for China is given in the figure. Similar  
676 confidence limits for other regions have been calculated but are not shown for the  
677 sake of clarity of the presentation. (b) Comparing different countries. The time is  
678 aligned by plotting the *NR* ratio only when the recovery/removal case numbers first  
679 exceed 50 (the actual numbers on that day are listed at the top), and  $T_0$  is that  
680 calendar date, listed in the inset. The figure in the bottom panel included the China  
681 cases again, to facilitate comparison with other countries, except the data used were  
682 smoothed by a 3-point boxcar filter in the lower panel.

683  
684 It would be interesting to understand why the empirically determined  $\log NR(t)$  lies  
685 on a straight line, and what determines its slope. See Appendix for a theoretical  
686 support. It is shown that, if the distribution of the new cases is Gaussian-like, the  
687 natural logarithm of the *NR* ratio, should be a linear function of time throughout the

688 course of the epidemic. The slope of the line is  $-\frac{T}{\sigma_R^2}$ .

689  $\sigma_R$ , is the standard deviation of the recovered case distribution and is close to that of  
690 the newly infected case,  $\sigma_N$ , twice of which measures the duration of the epidemic  
691 in that region. This expression is still valid even for a sigma that is changing in time  
692 as a response to changing social contact measures.

693  
694 A comparison of the Logarithm of *NR* ratio for several countries is given in Figure 4  
695 (b). A steeper slope is associated with an early turning point, and also a predictor for  
696 a shorter duration of the epidemic. The shallowest slopes in Figure 4 (b) was for  
697 Italy, where the enormous pressure strained their medical system to the limit,  
698 resulting in the largest  $\sigma_R$  value, and one of the highest case fatality rate in the world,  
699 at more than 12%. Germany and China have similar slopes. For China outside Hubei,  
700 the slope is steepest and the turning point reached 9 days earlier than Wuhan. South  
701 Korea's slope is even steeper due to that countries early action. As a result, Italy  
702 took a full month longer to reach its turning point than Germany and China, and  
703 more than 40 days longer than South Korea.

#### 704 705 **4.2 Predictability**

706 Since the logarithm of *NR* ratio lies on a straight line passing through the turning  
707 point of *AIC*, it would be interesting to explore if the turning point,  $t_p$ , can be  
708 predicted by extrapolation using data weeks before it happened. Extrapolating a  
709 straight line is much more practical than other more involved curve fitting

710 algorithms some other groups have adopted. How far in advance this can be done  
711 appears to be limited by the poor quality of the initial data, when  $R$  is small and  
712 highly fluctuating. Figure 5 (a) shows the results of such predictions for China, and 5  
713 (b) for Italy. It is a hind cast since the truth is now known (see Figure 8 for how it is  
714 determined). The horizontal axis indicates the last date of the data used in the  
715 prediction. The beginning date of the data used is 24 January for all experiments for  
716 China. Prior to that day, data quality was poor and the newly recovered number  
717 was zero in some days, giving an infinite  $NR$  ratio. For China outside Hubei, the  
718 prediction made on 6 February gives the turning point as 14 February, two days  
719 later than the truth. A prediction made on 8 February already converged to the  
720 truth of 12 February, and stays near the truth, differing by no more than fractions of  
721 a day with more data.

722  
723 The huge data glitch on 12 February in Hubei affected the prediction for Hubei, for  
724 China as whole, and for Hubei-exWuhan. These three curves all show a bump up  
725 starting on 12 February, as the slope of  $N(t)$  is artificially lifted. Ironically,  
726 predictions made earlier than 12 February are actually better. For example, for  
727 China as a whole, predictions made on 9 February and 10 February both give 19  
728 February as the turning point, only one day off the truth of 18 February. A  
729 prediction made on 11 February actually gives the correct turning point that would  
730 occur one week later. At the time these predictions are made, the newly infected  
731 cases were rising rapidly, by over 2,000 each day, and later by over 14,000. It would  
732 have been incredulous if one were to announce at that time that the epidemic would  
733 turn the corner a week later. Even with the huge spike for the regions affected by  
734 the Hubei's changing of diagnosis criteria, because of its short duration the artifact  
735 affects the predicted value by no more than 3 days, and the prediction accuracy soon  
736 recovers for China as a whole. For Hubei, the prediction never converges to the true  
737 value, but the over-prediction is only 2 days.

738  
739 Uncertainty associated with prediction using this method for China is shown in  
740 Figure 4(a). The uncertainty is a few days (the 95% confidence level is  $\pm 5$  days)  
741 and is usually somewhat larger than the accuracy. A prediction can be found later to  
742 be accurate but at the time it was made it may be equally likely for the prediction to  
743 be a few days earlier or later. The large uncertainty is again seen to be caused by the  
744 1,4000 bump of new cases in one day on 12 February due to the change in definition.  
745 For applications to other countries and to future epidemics without a change in the  
746 definition of the "infection" to such a large extent, we expect even better prediction  
747 accuracy and smaller uncertainty.

748  
749 This can be seen in the prediction for Italy. The error of predicting the turning point  
750 3 weeks in advance is only 1 or 2 days. In fact a prediction can be made 6 weeks in  
751 advance with an accuracy of 5 days or less.

752  
753 The prediction for US as a whole is less accurate (with errors up to 10 days) because  
754 its data is an aggregate of different epicenters. More accurate predictions can be  
755 made by treating each state separately. This is not done here because although the

756 data for new cases and deaths are available for each state, recovered data are not  
 757 individually available. It is also not accurate for UK because its data for recovered  
 758 may be suspect. See Table 1.  
 759  
 760  
 761

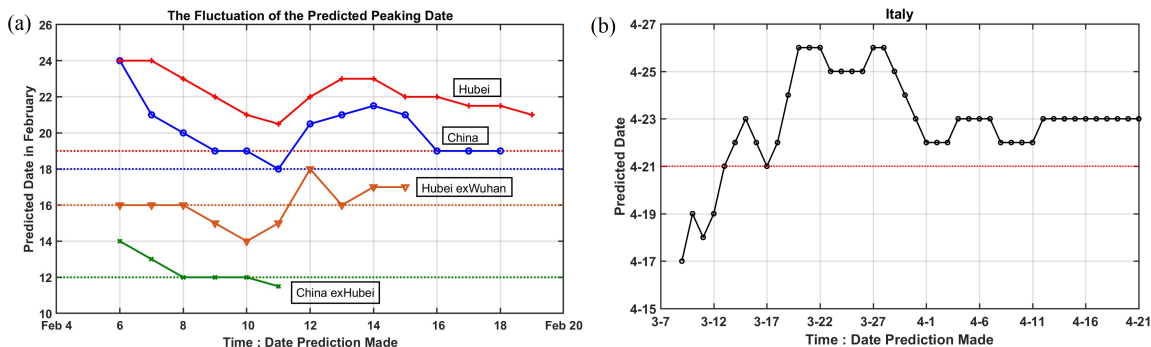

762  
 763 **Figure 5.** (a) Prediction of the turning point in *AIC* for different regions of China by  
 764 extrapolating the trends in logarithm of *NR*. The horizontal axis indicates the date  
 765 the prediction is made using data from 24 January to that date. The vertical axis  
 766 gives the dates of the predicted turning point. Dashed horizontal lines indicated the  
 767 true dates for the turning point. (b) Prediction of the turning point in *AIC* for Italy.  
 768 Data used for all predictions starts on 29 February. The first point shown predicts  
 769 the turning point to occur on 19 April (4 days early) 6 weeks in advance using 9  
 770 days of data from 29 February to 8 March.

771  
 772 **4.3. Derivative of Log of  $N(t)$  and  $R(t)$ .**

773 Interestingly, the derivative of  $\log N(t)$  or  $\log R(t)$  also lies on a straight line, as  
 774 shown in Figure 6 (although the scatter is larger as to be expected for any  
 775 differentiation of empirical data). Moreover, the straight line extends without  
 776 appreciable change in slope beyond the peak of  $N(t)$ , suggesting that the distribution  
 777 of the newly infected number is approximately Gaussian-like at least up to that point.  
 778 For an exponential function, the derivative of its logarithm being a linear function of  
 779 time is highly suggestive of a general type of distribution including Gaussian-like or  
 780 Rayleigh-like. The recovery time  $T$  can be determined as  $t_R - t_N$ , where  $t_R$  is the peak  
 781 of  $R(t)$  and  $t_N$  is the peak of  $N(t)$ . These two peak times can be obtained by extending  
 782 the straight line in Figure 6 (a) to intersect the zero line. This predicted result can be  
 783 verified statistically after the fact by the lagged correlation of  $R(t)$  and  $N(t)$ . If the  
 784 distribution is indeed Gaussian or even approximately so, the slope in Figure 6  
 785 should be proportional to the reciprocal of the square of its standard deviation,  $\sigma$ ,  
 786 as:

787 
$$\frac{d \log N(t)}{dt} = \frac{-(t - t_N)}{\sigma_N^2}.$$

788  
 789 Similarly result holds for the daily number of recovered,  $R(t)$ .  
 790

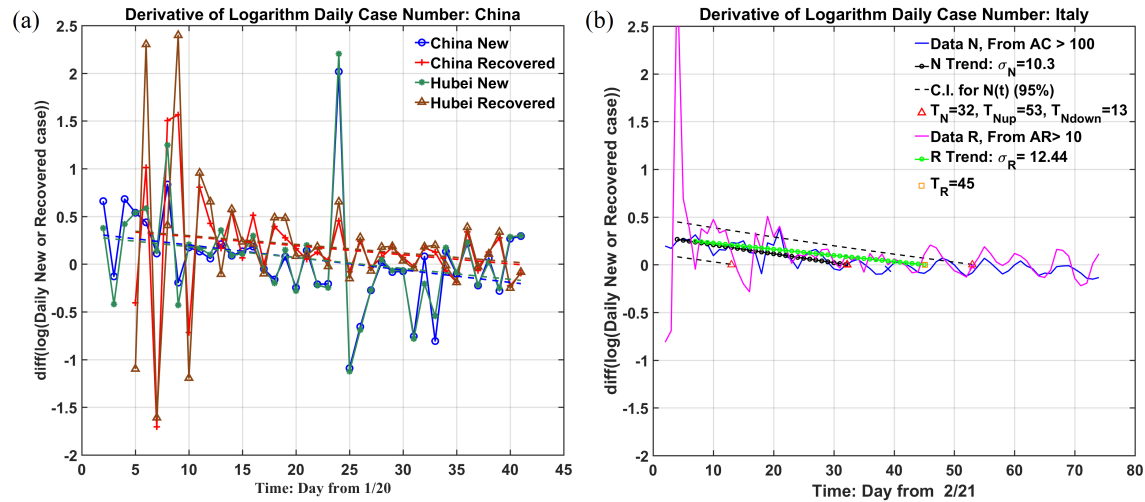

791

792

793

794

795

796

797

798

799

800

801

802

803

804

805

806

807

808

809

810

811

812

813

814

815

**Figure 6** (a). The derivative of the logarithm of daily newly infected or recovered for China and Hubei. Notice the clear separation of the new and recovered cases and also the subtle difference of their slopes. The zero crossings of the trend line give the peak dates of the new and recovered case respectively. And the slopes give an estimate of  $\sigma$  values. (b). Same as (a) but for Italy. Best fit lines for  $N(t)$  and  $R(t)$  are shown, and 95% confidence limits are shown for  $N(t)$  only. Italy's data appear to have a 7-day periodic oscillation, probably caused by a reporting issue. AR indicates accumulated R.

For countries without an adequate record of  $R(t)$ , this method can still be used for  $N(t)$ . We can obtain  $t_N$  and  $\sigma_N$ .  $T$  and  $t_p$  cannot be obtained, but can be estimated roughly as  $t_p = t_N + T/2$  (see Theory), using  $T \sim 20$  days applicable to countries with similar medical systems.

#### 4.4 The number of deaths

Because of public attention, predicting the number of deaths has been the main emphasis for some models. There is also the belief that death numbers are more reliable than case numbers, although that is not necessarily true. Although death number by itself could not satisfy conservation law, death is a subset of the newly confirmed cases; therefore, the death case distribution should follow the new cases with a time delay. In fact, this delay time could provide a measure of the efficacy of the medical system, as explained earlier.

In Figure 7, we present the cases for Italy, USA and UK.

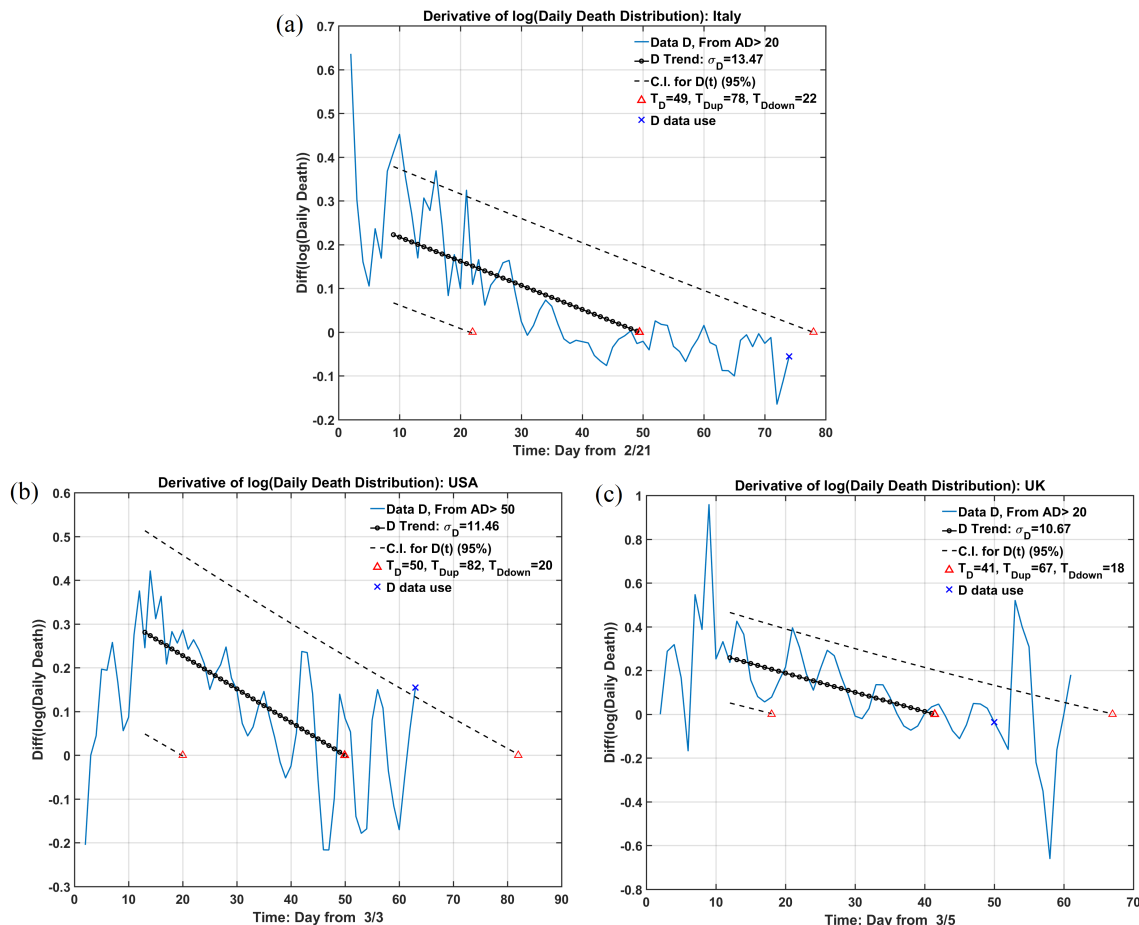

816  
 817  
 818  
 819  
 820  
 821  
 822  
 823  
 824  
 825  
 826  
 827  
 828  
 829  
 830  
 831  
 832  
 833  
 834  
 835  
 836

**Figure 7 (a), (b) and (c).** Logarithm for death distribution for Italy, USA and UK. Similar to 4.2, the derivative of logarithm of  $D(t)$  follows a straight line approximately, indicating that its distribution is also Gaussian-like, similar to  $N(t)$ . As a consequence, the peak of  $D(t)$  occurs at the intersection of that straight line with zero and could be predicted in advance, although in the three countries shown this peak has already occurred.

### 5. Inferred epidemiological characteristics.

Table 1 summarizes predictions for USA, some European countries, South Korea and China. In some countries, one or both of the critical points have just occurred. Even so, it is still difficult to know if one is at the peak without using our prediction procedure. The  $TIC_\infty$  is the Total Infected Cases for the whole epidemic, calculated as twice the value of  $TIC$  at  $t_N$ , and  $AIC_{peak}$  is the maximum of  $AIC$  at  $t_p$ . Appendix discusses how these quantities are computed/predicted.



|                       | $t_p$<br>(r)   | $t_N$<br>(r)   | $t_D$<br>(r)   | $AIC_{peak-K}$<br>(r) | $TIC_{\infty-K}$<br>(r) | $AFC_{\infty-K}$<br>(r) | $\sigma_N$<br>Days | CFR<br>--% | IPM<br>--Per M | FPM<br>--Per M |
|-----------------------|----------------|----------------|----------------|-----------------------|-------------------------|-------------------------|--------------------|------------|----------------|----------------|
| China                 | 2-21<br>(2-17) | 2-7<br>(2-13)  | 2-17<br>(2-14) | 44.4-54.1<br>(58.0)   | 87.7-163<br>(84.0)      | 3.8-6.6<br>(4.6)        | 8.79               | 5.53       | 59.98          | 3.31           |
| China<br>ex-<br>Hubei | 2-11<br>(2-12) | 2-5<br>(2-4)   | 2-16<br>(2-13) | 8.99-9.04<br>(8.94)   | 15.5-26.1<br>(15.8)     | 0.14-0.23<br>(0.13)     | 8.49               | 0.79       | 11.82          | 0.09           |
| South<br>Korea        | 3-15<br>(3-14) | 3-2<br>(3-1)   | 3-19<br>(3-29) | 7.08-8.35<br>(7.49)   | 8.84-16.2<br>(10.8)     | 0.18-0.30<br>(0.26)     | 6.31               | 2.36       | 209.42         | 4.94           |
| Italy*                | 4-23<br>(4-21) | 3-30<br>(3-21) | 3-31<br>(3-28) | 114-115<br>(108)      | 203-399<br>(213+)       | 24.8-42.1<br>(29.3+)    | 12.18              | 13.76+     | 3526.7+        | 485.3+         |
| Ger-<br>many*         | 4-4<br>(4-7)   | 3-31<br>(3-27) | 4-14<br>(4-15) | 50.7-69.5<br>(70.8)   | 144-309<br>(167+)       | 6.86-14.0<br>(7.0+)     | 9.62               | 4.19+      | 2014.6+        | 84.35+         |
| Spain*                | 4-22<br>(4-27) | 4-6<br>(3-26)  | 4-7<br>(4-1)   | 114-129<br>(105)      | 274-495<br>(248+)       | 28.1-48.4<br>(25.6+)    | 10.44              | 10.32+     | 5316.9+        | 548.5+         |
| USA*                  | 5-12<br>(NA)   | 4-19<br>(4-9)  | 4-22<br>(4-16) | 1400-1474<br>(943+)   | 1520-2410<br>(1204+)    | 90-140<br>(71.1+)       | 12.21              | 5.9+       | 3649.5+        | 215.3+         |
| UK*                   | 6-30#<br>(NA)  | 4-20<br>(4-10) | 4-20<br>(4-30) | 11789#<br>(165+)      | 249-392<br>(195+)       | 33-62<br>(29.4+)        | 14.21              | 15.1+      | 2932.2+        | 442.5+         |

837

838

839

840

841

842

843

844

845

846

847

848

849

850

851

852

853

854

855

856

857

858

859

860

861

862

863

864

865

866

867

868

**Table 1.** Summary of the predictions made on May 5, 2020. **Notes:** Countries with “\*” sign after a country name indicates that the epidemic is still developing, although some of the particular event might have happened. The number in the parenthesis is the actual data. A “+” sign indicates the latest value in the particular case that is still developing and that particular event has not happened yet. The ‘#’ indicated the result might be questionable, for the lack of recovered case numbers.

IPM= Infection per Million of Population. FPM=Fatality per Million of population.

## 6. Discussions and Conclusion.

There are actually two modeling approaches: mechanistic and statistical models. Mechanistic model is based on precisely defined epidemical parameters. Without *a priori* knowledge of the disease characteristic and existing social contact conditions, however, many of the parameters used are based on assumptions and educated guesses. Nevertheless, they are useful for exploring different scenarios for the policy decision to fight an epidemic prior to the rapid rise of the outbreak. In this paper, we introduced a statistical model that could also serve an important role complementary to the mechanistic models, to be used after the outbreak started. It can provide detailed tracking and prediction of the course of the epidemic. For the statistical model to work well, good quality data are indispensable. Our study indicated that with quality data, tracking and prediction of critical events such as the peak and the turning point could be accurate within days.

Our model is supported by underlying theoretic foundation and validated by the existing data from the region where the pandemic is waning. Many parameters characterizing an epidemic can be determined from local-in-time data. Because it is based on general epidemiological principles we suggest that our approach could be applied not just to the current Covid-19 epidemic, but also generally to future epidemics.

Importantly, we made explicit the concept of “suppressed equilibrium” as an end state of an epidemic in addition to the traditional “herd immunity” state. Based on

869 the traditional mechanistic model, an epidemic ends after a high percentage of the  
870 population is infected and recovered hence acquiring immunity. This is the so-  
871 called “herd immunity” idea. For COVID-19, which we found to be very contagious,  
872 more so than previously thought, the “herd immunity” end would require almost all  
873 of the population be infected and therefore would bring unthinkable toll in the  
874 number of people sick and dead. A second way for an epidemic to end is with strict  
875 contact-reduction measures, so that although a large pool of susceptible population  
876 still exists, the portion that an infected person comes in contact with is reduced by  
877 the measures adopted, again leading to the Effective Reproductive Number less than  
878 1. Unlike the first end state mentioned above, this “suppressed” state is  
879 “parametrically unstable” in the sense that if the social distancing measures are  
880 relaxed before the epidemic ends or new infection is imported after the first wave  
881 ends, the epidemic will rebound, as a large portion of the population is still  
882 susceptible. For this second state to be a stable equilibrium, the social-distancing  
883 measures, and quarantine of cross-border visitors need to be maintained until it is  
884 clear that the disease has died off. It is this second state that most countries are now  
885 aiming for.

886  
887 The second state will have a much earlier date for the new cases to peak and the  
888 epidemic to end. For the US the peak of the newly infected cases is April 7-11. The  
889 epidemic is estimated here to end in the first week of June, assuming the current  
890 social distancing/stay-at-home measures are maintained till then, and after that  
891 date import of infected from abroad is prevented by strict quarantine of visitors.  
892 These assumptions now do not look like they would hold as states begin to open  
893 their business prematurely. For the US, we predict that the total number of infected  
894 cases is 1.5 to 2.4 million, dependent on the assumption. These are symptomatic  
895 cases that require hospitalization.

896  
897 Since it is the goal of most countries to eventually approach the “suppressed  
898 equilibrium”, it is important to note that the slowing growth of the incidence (daily  
899 newly infected) that is observed is not a function of biology, but is a result of  
900 contact-reduction, which is social science. The mechanism of the exhaustion of  
901 susceptibles is not relevant anymore as the number of infected is such a very small  
902 percentage of the susceptible population. Therefore it is not necessary to use a  
903 model, such as SIR or SEIR, to keep track of the change in susceptibles after the start  
904 of the outbreak. If these mechanistic models are to be used to track the progress of  
905 an outbreak, the infection rate  $a$  in the models needs to be adjusted constantly, but it  
906 is not clear how to adjust it. In any case, the solution is responding to input of  
907 changing model parameters, and not to the natural biological evolution built into the  
908 model structure, such as recovery and immunity upon recovery.

909  
910 This is a new way to look at the field of epidemiology. The observed slowing of the  
911 growth of incidence and the cresting of the epidemic curve are dominantly the  
912 result of a reduction of “infectivity”, as first proposed by John Brownlee one  
913 hundred years ago, except that the change is not due to biology---- from the “loss of  
914 the infecting power on the part of the organism” as he thought, at least not in the

915 case of COVID-19, but as the consequence of reduced contacts among people in  
916 lowering the Reproduction Number, which is defined as the number of other people  
917 one infected person would infect. This measure is a product of the average number  
918 a typical infected person comes in contact with and the probability that a contacted  
919 person becomes infected. While the study of the latter is biology and medicine, that  
920 for the former is social science and public health.  
921  
922  
923

## Appendices: THEORY

924

925

926 **Definition:** Let  $I(t)$  be the number of active infected at time  $t$ . Its change is given

927 by;

928 
$$\frac{d}{dt}I = N(t) - R(t),$$

929 where  $N(t)$  is the number of newly infected, and  $R(t)$  that of the newly recovered or  
930 removed (dead). The term: Acting Infected Case (*AIC*) number is used to denote the  
931 confirmed  $I(t)$  when we deal with data.

932

933 Let  $t_p$ , the turning point defined as the peak of the active infected number. At this

934 point maximum medical resource is needed. This maximum occurs when

935 
$$\frac{d}{dt}I = 0, \text{ implying } N(t_p) = R(t_p).$$

936 There is no need to first find  $I(t)$  to locate this peak. Figure 8 shows how this is  
937 determined locally. This local-in-time metric avoids the accumulation of poor early  
938 data. After the turning point, the newly recovered starts to exceed the newly  
939 infected. The demand for medical resources, such as hospital beds, isolation wards  
940 and respirators, starts to decrease.

941

942 We consider a solitary outbreak. Let  $t = 0$  be when the first infection began. For  
943 Wuhan, China, this date is near the end of 2019, perhaps even earlier. Let  $t_B$  be the  
944 beginning of the better quality data. This time is beyond the initial incubation  
945 period of the disease and it can be assumed that at that time there is already a  
946 population of infected, some of them asymptomatic but nevertheless infectious.

947

948 Let  $X(t,s)$  be the number of infected cases at time  $t$ , with  $s$  being the “age”  
949 distribution, i.e. number of days sick.

950 The total number of infected is given by:

951 
$$I(t) = \int_0^T X(t,s) ds .$$

952 After being sick for  $T$  days, a patient either recovers or is removed (dead).  $T$  is called  
953 the recovery period (or removal period). It is also called the infectious period if the  
954 patient is infectious during this period. Of course its value varies by patient and by  
955 the efficacy of treatment for each hospital. For the removed it also depends on the  
956 age of the patient and whether there are underlying medical conditions. Only a  
957 mean recovery period is obtainable from data, and so this is in reality a statistical  
958 quantity. We will discuss later how this statistical quantity can be obtained from  
959 data.

960

961 **Conservation law** (see ref(22)):

962 After first infected and until removed or cured, we have:

$$dX(t,s) = \frac{\partial}{\partial t} X \cdot dt + \frac{\partial}{\partial s} X \cdot ds = 0, \quad 0 < s < T.$$

963 So, since  $ds/dt = 1$ ,

$$\frac{\partial}{\partial t} X + \frac{\partial}{\partial s} X = 0.$$

964 This equation is to be solved using the method of characteristics as

$X(t,s) = \text{constant}$  along characteristics defined by  $ds/dt = 1$ .

Boundary condition:  $X(t,0)$ , specifies the "birth" process,

965 i.e. how the disease spawns newly infected (with "age"  $s = 0$ ).

Initial condition:  $X(0,s) = 0$  for  $s > 0$ , specifies the initial age distribution at  $t = 0$

966 There are two types of characteristics:

967 (i)  $s > t$ , (ii)  $s < t$ .

968 The first type of characteristics intersects the  $t = 0$  axis, and since the initial  
969 condition is zero, we have the solution:  
970

971  $X(t,s) \equiv 0$  for  $s > t$ .

972

973 That is, there is no infected population who is sick for more days than the lapsed  
974 time since the first infection occurred.

975

976 For the second type of characteristics,  $t > s$  the solution is  
977

978  $X(t,s) = f(s-t)$

979 with the form of  $f$  to be determined by the boundary condition. Even without  
980 determining the form of  $f$  we have the following general results:

981 For  $t > T$ , and therefore  $t > s$ :

$$\begin{aligned} 982 \quad I(t) &= \int_0^T X(t,s) ds = \int_0^T f(s-t) ds \\ &= \int_{t-T}^t f(p) dp. \end{aligned}$$

$$983 \quad \frac{d}{dt} I = f(t) - f(t-T).$$

984

985 Since the rate of increase of  $I(t)$  is by definition equal to the newly infected number,  
986  $N(t)$ , minus the newly recovered (or removed) number,  $R(t)$ , we have:

$$987 \quad N(t) - R(t) = \frac{d}{dt} I = f(t) - f(t-T).$$

988

989 For a fatal disease with low fatality rate, where almost all infected cases eventually  
990 recover after a hospital stay of  $T$  days, we can identify

991  $f(t)$  with  $N(t)$ , and  $f(t-T)$  with  $R(t)$ .

992 If the disease has a non-negligible fatality rate, we include the dead in  $R(t)$ .

993 **Main Result:** The daily newly recovered/removed number  $R(t)$ , is related to the  
994 daily newly infected number  $N(t)$  as, for  $t > T$  :

995

996

997

$$R(t) = N(t - T).$$

998 The second type of characteristics intersects the boundary  $s = 0$ . The boundary  
999 condition itself needs to be solved as a function of  $t$  to describe how new infection  
1000 (at  $s = 0$ ) occurs. This can be done using a birth model, such as Eq. (1.56) in (23).

1001

1002 *Boundary condition:* Following Murray's Eq. (1.56), the "birth" is assumed to be  
1003 proportional to "parents" of suitable "age", with an age-dependent birth rate,  $a(s)$ .

1004

1005 
$$X(t, 0) = \int_0^T a(s)X(t, s)ds .$$

1006 This equation needs to be solved numerically, except in the case of constant  $a$ . The  
1007 solution for  $X(t, 0) = g(t)$  is generally an increasing function of time.

1008 Since  $X(t, s) = g(t - s)$ , at some time  $t_B > T$ ;  $X(t_B, s) = g(t_B - s) \equiv f_0(s)$ . That is, an  
1009 "age" distribution can be converted into a time profile through the method of  
1010 characteristics.

1011

1012 The solution of the integral equation is not presented here. For our purpose here it  
1013 suffices to assume that the solution of this model yields a distribution with age that  
1014 has a full spectrum  $0 < s < T$  of infectives at a time  $t_B$ , long after a full incubation  
1015 period has passed.

1016 
$$X(t_B, s) = f_0(s) = A \exp\left\{-\frac{(s - s_0)^2}{2b^2}\right\}; A \text{ independent of } s.$$

$$b = \frac{1}{2}T.$$

1017 This distribution is justified as follows:

1018 To the right of the peak in "age" distribution, it is easy to understand that the  
1019 numbers for those who are "older" should be less because they were infected earlier  
1020 during an earlier stage of the epidemic. As the epidemic grows exponentially, there  
1021 are more and more "younger" infectives. To the left of the peak in "age" distribution  
1022 many are at various stages of incubation. Those who are newly infected may be  
1023 large in number, but they are less infectious and contribute less to the growth of the  
1024 subsequent infection, and since they have not developed symptoms, they are less  
1025 likely to be hospitalized, tested and contribute to the "case" record. For Covid-19,  
1026 the peak infectiousness occurs in a period just before and after the onset of  
1027 symptoms, around 5-6 days since first infected (23). The above discussion gives an  
1028 epidemiological justification for a Gaussian-like distribution of the "age" distribution  
1029 of the "new cases", more appropriately called "new hospitalization per day".

1030

1031 It is important to point out that the assumption of less “cases” to the left of the peak  
 1032 is the only “filter” that serves to limit our theoretical discussion to the data of  
 1033 symptomatic cases. If all infected were included,  $f_0(s)$  should have a maximum at  
 1034  $s = 0$ .

1035 Therefore the solution is, for  $t > t_B > 0$ :

$$1036 \quad X(t,s) = X(t_B, s-t) = f_0(s-t) \\ = A \exp\left\{-\frac{(s-s_0-t)^2}{2b^2}\right\}.$$

1037

$$1038 \quad N(t) = A \exp\left\{-\frac{(t-s_0)^2}{2b^2}\right\} = A \exp\left\{-\frac{(t-t_N)^2}{2b^2}\right\}$$

$$R(t) = N(t-T) = A \exp\left\{-\frac{(t-t_R)^2}{2b^2}\right\},$$

1039 where  $t_N$  is the peak of  $N(t)$ , and  $t_R = t_N + T$  is the peak of  $R(t)$ .

1040 Both distributions are Gaussians.

1041

1042 For  $t_B < t < T$ ,

$$1043 \quad I(t) = \int_0^t X(t,s) ds + \int_t^T X(t,s) ds \\ = \int_0^t f(s-t) ds + \int_t^T 0 ds \\ = \int_{-t}^0 f(p) dp$$

$$1044 \quad \frac{d}{dt} I = f(-t) = A \exp\left[-\frac{(t-s_0)^2}{T^2}\right].$$

$$1045 \quad N(t) = A \exp\left[-\frac{(t-t_N)^2}{T^2}\right]$$

$$R(t) = 0.$$

1046 Again,  $N(t)$  is Gaussian, but there is no recovered or removed during this early stage.

1047

1048 **Main Result:** The natural logarithm of the ratio of  $N$  and  $R$  is a linear function of  
 1049 time for  $t > T$ :

1050

$$1051 \quad NR(t) = \frac{N(t)}{R(t)} = \frac{N(t)}{N(t-T)} \\ = \exp\left\{-\frac{(t-t_N)^2}{2b^2} + \frac{(t-t_N-T)^2}{2b^2}\right\} = \exp\left\{\frac{T^2}{2b^2} - \frac{T(t-t_N)}{b^2}\right\}.$$

$$\log NR = -\frac{T(t-t_N) - \frac{1}{2}T^2}{b^2}$$

1052 a linear function of  $t$ .

1053

### 1054 **Heterogeneous Data**

1055 The above results are obtained for the case of a single introduction into a region of  
 1056 infected at  $t=0$  and we solve for the subsequent development of the epidemic from  
 1057 that single source. Consider now a large region consisting of a number of small  
 1058 regions, and the “seeding” of the infected occurs at different times for different  
 1059 regions. The large region could be China, and the first infection could be Wuhan,  
 1060 Hubei and then the regions outside Hubei. Then we may have for the China as a  
 1061 whole data for the newly infected a sum of several Gaussians staggered in time. As  
 1062 long as the Gaussians are not separated so much that there are different peaks in the  
 1063 combined data, the combined data can still be considered as Gaussian, as is the case  
 1064 in the real data. However, the standard deviation  $\sigma$  of the combined Gaussian is  
 1065 inevitably larger and is no longer given by  $b$ :

$$1066 \quad N(t) = \frac{B}{\sqrt{2\pi}\sigma_N} \exp\left\{-\frac{(t-t_N)^2}{2\sigma_N^2}\right\}.$$

1067 We still have  $R(t) = N(t-T)$  since this result holds for each sub-region. The result  
 1068 that  $\log NR$  is a linear function of time still holds:

$$1069 \quad \log NR(t) = \log \frac{N(t)}{N(t-T)} = -\frac{T(t-t_N) - \frac{1}{2}T^2}{\sigma_N^2}.$$

1070 The slope of the straight line is  $T/\sigma_N^2$ .

1071

1072 Since the hospital stay can act as a smoothing filter on  $N(t)$  to yield  $R(t)$ , the  
 1073 standard deviation for  $R(t)$  could be slightly wider than that for  $N(t)$ . So we could  
 1074 have two different Gaussians (but their integral over all time should be the same):

$$1075 \quad N(t) = \frac{B}{\sqrt{2\pi}\sigma_N} \exp\left\{-\frac{(t-t_N)^2}{2\sigma_N^2}\right\}; \quad R(t) = \frac{B}{\sqrt{2\pi}\sigma_R} \exp\left\{-\frac{(t-t_R)^2}{2\sigma_R^2}\right\}.$$

1076 Taking this into account, we have, denoting  $T = t_R - t_N$ :

$$1077 \quad \log NR - \log \frac{\sigma_R}{\sigma_N} = -\left\{\frac{(t-t_N)^2}{2\sigma_N^2} - \frac{(t-t_N-T)^2}{2\sigma_R^2}\right\} = -\frac{(\sigma_R^2 - \sigma_N^2)(t-t_N)^2 + 2\sigma_N^2 T(t-t_N) - \sigma_N^2 T^2}{2\sigma_N^2 \sigma_R^2}$$

1078

1079 As the values of  $\sigma_N$  and  $\sigma_R$  are very close based on the empirical data, the quadratic  
 1080 term is always small comparing to the other terms for the length of time we are  
 1081 considering here. Hence,

$$1082 \quad \log NR(t) = \frac{1}{\sigma_R^2} \left\{-T(t-t_N) + \frac{1}{2}T^2\right\},$$

1083 a linear function of time. Its slope is  $-\frac{T}{\sigma_R^2}$ .

1084 A caveat: For widely separated countries, such as China and US, the two Gaussian  
 1085 peaks are separated in time. These two regions should be treated separately so that



1086 the data for each region has only a single peak. Similarly for Europe and China. See  
1087 Appendix. There is also a problem with the aggregate data for the US consisting of  
1088 different states with outbreaks separated in time.

1089  
1090 **Result:** The natural logarithm of the ratio of two Gaussians of slightly different  
1091 standard deviation is approximately a straight line, providing the data used is  
1092 homogeneous temporally and spatially.

1093  
1094 Sometimes, heterogeneity in one variable could be relaxed in an overall mean. The  
1095 case in China is an example. The case could be treated as whole China even though  
1096 China included Hubei and Wuhan and the very different region of China outside  
1097 Hubei, for the outbreak occurred at the same time. But the cases in China and  
1098 European countries and US could not be treated as a whole, for they are separated  
1099 both spatially and temporally. Consequently, it would be impossible to talk about a  
1100 single distribution for the global prediction.

1101  
1102 **Time-varying  $\sigma$  and  $t_N$**

1103 The above derivations continue to hold even for  $\sigma$  being a function of time. This  
1104 becomes relevant when, for example, after the epidemic passes its peak the policy  
1105 makers decide to relax the restrictions on social distancing. Such actions alter the  
1106 course of the epidemic and create a longer tail of new cases.  $N(t)$  is no longer  
1107 Gaussian because it does not have fore-aft symmetry. Since such government  
1108 actions are not included in the initial prediction, the prediction scheme needs to  
1109 adapt using real-time data after the peak. Our method allows for it.

1110  
1111  
1112 **The peak infected cases:**

1113 Writing  $N(t_N) = N(t_B) \exp\{\int_{t_B}^{t_N} n(t) dt\}$ , and noting  $n(t) = \frac{d}{dt} \log N(t) = -\frac{(t-t_N)}{\sigma_N^2}$ , the

1114 exponent is  $\int_{t_B}^{t_N} n(t) dt = \frac{(t_N - t_B)^2}{2\sigma_N^2} = \frac{1}{2} n(t_B)(t_N - t_B)$ . Hence the peak infected case number

1115 can be predicted, using the predicted value for  $t_N$  starting from a conveniently chosen  
1116 time  $t_B$ , such as the latest time with data available, as:

$$1117 \quad N(t_N) = N(t_B) \exp\left\{\frac{n(t_B)(t_N - t_B)}{2}\right\} .$$

1118  
1119 **Accumulated quantities.**

1120 To calculate  $I(t)$  using reported data, only confirmed cases are used (We call it AIC).  
1121 It is given by the accumulated newly confirmed cases minus the accumulated  
1122 confirmed recovered. Since the accumulation of early poor data can introduce  
1123 errors a more local-in-time formula is given as:

1124

1125 
$$I(t) = \int_{-\infty}^t N(t)dt - \int_{-\infty}^t R(t)dt = \int_{-\infty}^t N(t)dt - \int_{-\infty}^t N(t-T)dt$$
$$= \int_{t-T}^t N(t)dt.$$

1126 That is, to find  $I$  at time  $t$ , one only needs to add up the daily newly infected case  
1127 numbers for a period of  $T$  preceding  $t$ . This is an almost local-in-time property even  
1128 for this accumulated quantity. For validation, we estimate the peak of the  $I$  case  
1129 number on 18 February by computing the sum of daily newly infected case numbers  
1130 for 15 days, from February 4 to February 18, which yields a peak value for the total  
1131 infected cases on 18 February of 54,747. This is within 10% of the reported number  
1132 of 57, 805, even after taking into account the deaths (by subtracting the  
1133 accumulated deaths of 2,004 from our estimate).

1134  
1135 The Total Infected Cases (TIC) is one of the most reported statistics:

1136 
$$TIC(t) = \int_0^t N(t)dt.$$

1137 The total infected cases for the epidemic for a region after it is over is given by  
1138 approximately:

1139 
$$TIC_{\infty} = 2 \cdot TIC(t_N),$$

1140 assuming that  $N(t)$  is approximately symmetric about its peak at  $t_N$ . In reality  $N(t)$   
1141 may not be symmetric and likely has a long tail. However, since the number of cases  
1142 along the tail is small, the above approximation for the total is still good. Since TIC is  
1143 officially available at any time  $t$  we will use that reported number, projected forward  
1144 to the peak  $t_N$ , and then doubling it. Caveat: the official number may include  
1145 accumulation of early bad data. Hopefully it is a small percentage of the sheer size of  
1146 the TIC.

1147  
1148 The peak  $AIC$  number can be predicted as

1149 
$$I(t_p) = I(t_B) \exp\{\frac{1}{2} \alpha(t_B)(t_B - t_p)\},$$
 where  $t_B$  is the last available data before the

1150 turning point. It is assumed that  $\alpha(t)$  lies on a straight line between  $t_B$  and  $t_p$ .

1151 This is the maximum load that health services need to plan for, and adopt “flatten the  
1152 curve” policies to keep this number under the maximum resources available, such as  
1153 hospital beds and isolation wards.

1154

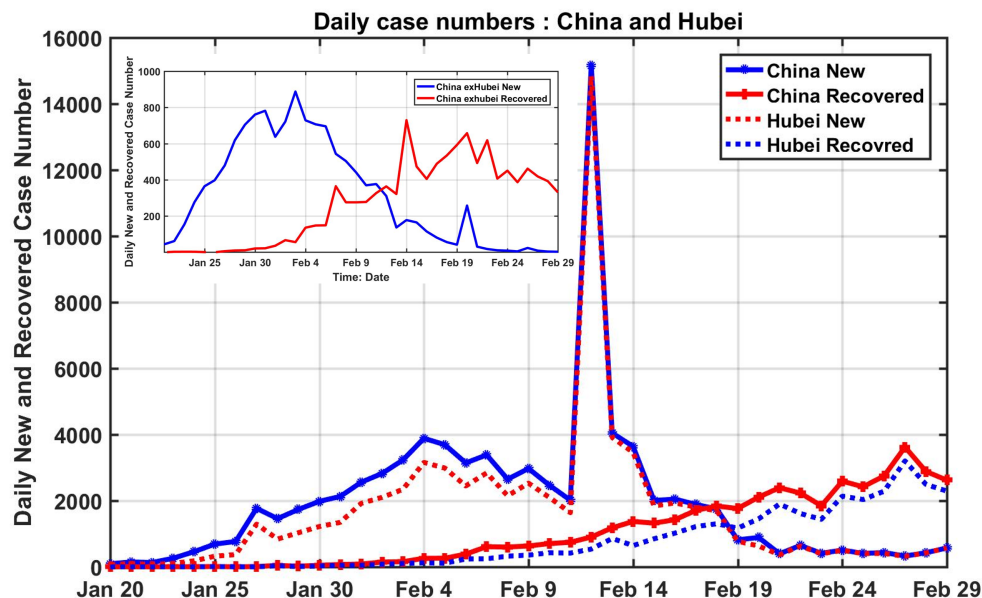

1155  
1156

**Figure 8.** The daily newly infected (in blue) and the daily newly recovered (in red), as a function of time for China as a whole (in solid lines) and Hubei (in dotted red and blue lines). The turning point is determined by when the red and blue curves cross.

1159  
1160  
1161 **Inset:** For China outside Hubei.  
1162

### 1163 1164 **The problem with data quality**

1165  
1166 The performance of all data-driven models depends on the quality of data. In general,  
1167 there are problems with data from all countries. Underreporting is universal to all  
1168 countries at least during the initial period of the epidemic. The causes might be different.  
1169 In China, for example, the data collection was erratic in the early days for lack of  
1170 awareness of the novel virus. A more common cause was the shortage of test kits to  
1171 identify the cases. The situation is made more complicate by the existence of  
1172 asymptomatic cases. However, whether to include those cases or not depends on the  
1173 definition. In this study, by definition, the cases are limited to confirmed ones with  
1174 symptoms, for only those cases would tax the medical resources. In fact, the best any  
1175 country can do is to record the confirmed new case accurately. The cases for death seem  
1176 to be simple, for the number of deaths has attracted great attention by the government and  
1177 public alike. Many models are designed to follow only death cases. However, even here,  
1178 the numbers are not problem-free. For lack of testing, large number of unattributed  
1179 COVID-19 deaths exists in every country. Finally, the most critical problem is for the  
1180 recovered case numbers. It is important to have this record, for it is essential for the  
1181 conservation law discussed above. Furthermore, the new to recovery/removal case ratio  
1182 (NR Ratio) provides a robust prediction for the turning point of the epidemic.  
1183 Unfortunately, the recovered case numbers had attracted the least attention. As a result, it  
1184 is not recorded or reported in some countries, such as UK. Under this condition, many of

1185 the tracking and prediction can still be made as demonstrated in the main text. However,  
1186 we strongly urge data for the recovery case to be recorded accurately, for it could not  
1187 only provide accurate prediction for medical resource preparation, but also as a measure  
1188 of the medical system efficacy.  
1189

1190 Finally, a few words on data homogeneity. All models, statistical or mechanistic, require  
1191 homogeneous condition. There are actually two types of homogeneity: temporal and  
1192 spatial. We believe the temporal homogeneity is more critical. For example, China can  
1193 be treated as a whole entity even with part of China, such Hubei and Wuhan under strict  
1194 lockdown, and part of China is not. The result still makes sense because of its temporal  
1195 homogeneity. Temporal inhomogeneity, however, would render the data nonsensical.  
1196 Let us take the global condition as an example. There is a gap in time between the  
1197 Chinese cases and the rest of the world (see Figure 9). No model should treat the two  
1198 events as one. See Figure 10. On the other hand, the European country and the US could  
1199 be treated as the World exChina, for the outbreak in European countries and the US  
1200 happened at about the same time, even though they are spatially separated widely.  
1201

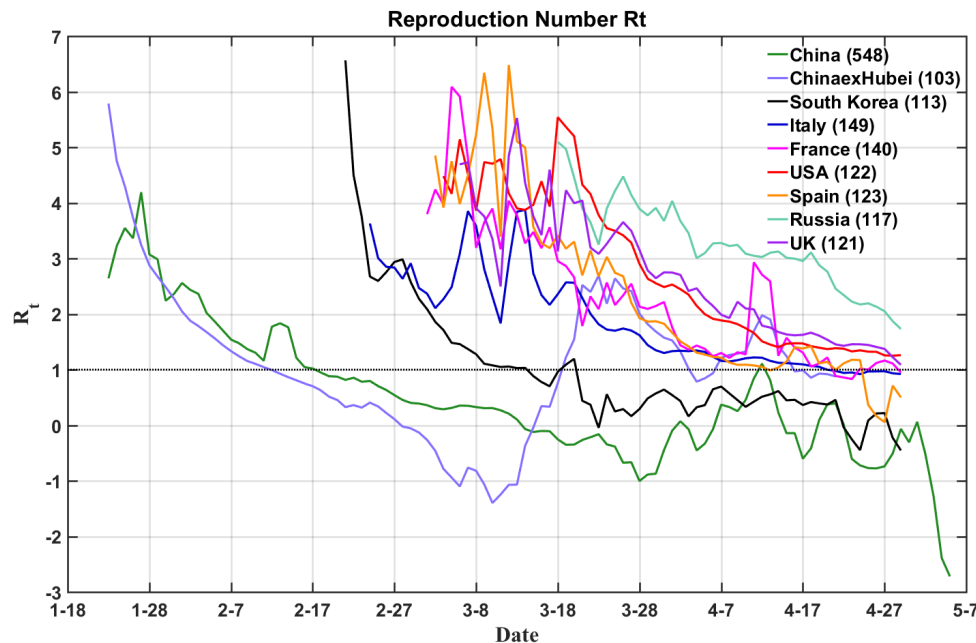

1202  
1203 **Figure 9.** This figure shows the Reproduction Number in real time starting on 20  
1204 January. In this presentation, one can see the pandemic is consisted of a serial  
1205 event with severe data inhomogeneity in both space and time. The outbreaks were  
1206 almost over in China and South Korea before the earliest cases in Italy and Spain  
1207 started to rise. There were 40 days difference between China and South Korea on  
1208 one hand, and the cluster of the pandemic flared up in European countries and the  
1209 US on the other hand.  
1210  
1211

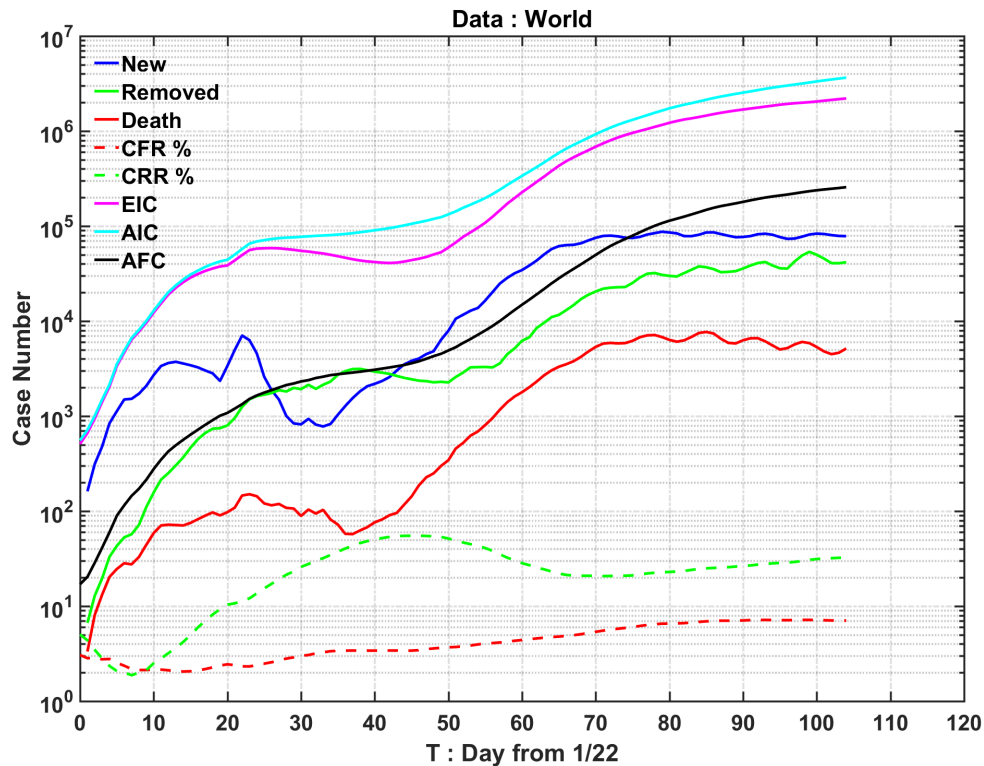

1212  
1213  
1214  
1215  
1216  
1217  
1218  
1219  
1220  
1221  
1222  
1223  
1224  
1225  
1226  
1227  
1228  
1229  
1230  
1231  
1232  
1233  
1234  
1235  
1236  
1237

**Figure 10.** China and the rest of the world should be treat separately.

**Acknowledgements:** NEH and FQ are supported by the National Natural Science Foundation of China under Grant 41821004. KKT's research is supported by the Frederic and Julia Wan Endowed Professorship.

**Competing Interests:** The authors declare no competing interests.

**Data Availability:** All data in this study are publicly available from World Health Organization (WHO) at <https://www.who.int/emergencies/diseases/novel-coronavirus-2019/situation-reports/>

and on the Daily Brief site of the China's National Health Commission at <http://en.nhc.gov.cn/>

The Korean data is available at

<https://sa.sogou.com/new-weball/page/sgs/epidemic>

Coronavirus COVID-19 Global Cases by Johns Hopkins CSSE

<https://gisanddata.maps.arcgis.com/apps/opsdashboard/index.html#/bda7594740fd40299423467b48e9ecf6>

[https://github.com/CSSEGISandData/COVID-](https://github.com/CSSEGISandData/COVID-19/tree/master/csse_covid_19_data/csse_covid_19_time_series)

[19/tree/master/csse\\_covid\\_19\\_data/csse\\_covid\\_19\\_time\\_series](https://github.com/CSSEGISandData/COVID-19/tree/master/csse_covid_19_data/csse_covid_19_time_series)

1238 **References**

- 1239 1. Cyraboski D. When will the coronavirus outbreak peak? Nature News. 2020.  
1240 2. Adams D. Modelers struggle to predict the future of the COVID-19 pandemic.  
1241 The Scientist. 2020.  
1242 3. Kermack W, McKendrick A. A contribution to the mathematical theory of  
1243 epidemics. . Proc Roy Soc London 1927;A115:700-21.  
1244 4. Ferguson NM. Impact of non-pharmaceutical interventions (NPIs) to reduce  
1245 COVID-19 mortality and healthcare demand. *Spiral*. 2020.  
1246 5. Flaxman S. Report 13: Estimating the number of infections and the impact of  
1247 non-pharmaceutical interventions on COVID-19 in 11 European countries. *Spiral*.  
1248 2020.  
1249 6. Sanche S, Lin YT, Xu C, Romero-Severson E, Hengartner N, Ke R. High  
1250 contagiousness and rapid spread of severe acute respiratory syndrom coronavirus 2.  
1251 *Emerging Infectious Disease*. 2020;26(7).  
1252 7. Bendavid E, Mulaney B, Sood N, Shah S, Ling E, Bromley-Dulfano R, et al.  
1253 COVID-19 antibody seroprevalence in Santa Clara county, California. *medRxiv*. 2020.  
1254 8. Susser M, A. A. Causes of death: epidemic, infectious, and zymoptic diseases.  
1255 *Vital Statistics: A memorial volume of selections from the reports and writings of*  
1256 *William Farr*: Scarecrow Press Inc.; 1975. p. 317-21.  
1257 9. Murray C. Forecasting COVID-19 impact on hospital bed-days, ICU-days,  
1258 ventilator-days and deaths by US state in the next 4 months 2020.  
1259 10. Jewell NP, Lewnard JA, Jewell BL. Caution Warranted: Using the Institute for  
1260 Health Metrics and  
1261 Evaluation Model for Predicting the Course of the COVID-19 Pandemic. *Annals of*  
1262 *Internal Medicine*. 2020;173(3).  
1263 11. Woody S, Tec M, Dahan M, Gaither K, Lachmann M, Fox SJ, et al. Projections  
1264 for first-wave COVID-19 deaths  
1265 across the US using social-distancing  
1266 measures derived from mobile phones. Preprint. 2020.  
1267 12. Fine PEM. John Brownlee and the measurement of infectiousness: An  
1268 historical study in epidemic theory. *Jornal of Royal Statistical Society A*.  
1269 1979;142:347-62.  
1270 13. Brownlee J. Statistical studies in immunity. The theory of an epidemic. *Proc*  
1271 *Roy Soc Edinburgh*. 1907;26:484-521.  
1272 14. Brownlee J. Statistical studies in immunity:the theory of an epidemic. *Proc R*  
1273 *Soc Edinburg*. 1907;26:484-521.  
1274 15. Huang NE, Qiao F. A data driven time-dependent transmission rate for  
1275 tracking an epidemic: a case study of 2019-nCoV. 65, 425-427, . *Sci Bull*.  
1276 2020;65:425-7.  
1277 16. Delamater PL, Street EJ, Leslie TF, Yang YT, H. JK. Complexity of the Basic  
1278 Reproduction Number (R0). *Emerging Infectious Diseases*. 2019;25.  
1279 17. Wu JT, Leung K, Leung GM. Nowcasting and forecasting the potential  
1280 domestic and international spread of the 2019-nCoV outbreak originating in Wuhan,  
1281 China: a modelling study. . *Lancet*. 2020;395(10225):689-97.

- 1282 18. Anderson RM, Heesterbeek H, Klinkenberg D, Hollingsworth TD. How will  
1283 country-based mitigation measures influence the course of the COVID-19 epidemic?  
1284 Lancet. 2020;395:931-4.
- 1285 19. Wallinga J, Teunis P. Different epidemic curves for severe acute respiratory  
1286 syndrome reveal similar impacts of control measures. Ameri J Epidemiology.  
1287 2004;160:509-16.
- 1288 20. Fraser C, Donnelly CA, Cauchemez S, Hanage WP, Van Kerkhove MD.  
1289 Pandemic potential of a strain of influenza A (H1N1): Early findings. Science.  
1290 2009;324:1557-61.
- 1291 21. Thakkar N, Burstein R, Hu H, Selvaraj P, Klein D. Social distancing and  
1292 mobility reductions have reduced COVID-19 transmission in King County, WA.  
1293 Institute for Disease Modeling; 2020.
- 1294 22. Murray JD. Mathematical Biology I. Third ed: Springer. 551 p.
- 1295 23. Lauer SA, Grantz KH, Bi Q, Jones FK. The incubation period of coronavirus  
1296 disease 2019 (COVID-19) from publicly reported confirmed cases: estimation and  
1297 application. Annals of Internal Medicine. 2020;172:577-82.
- 1298
